# Supplementary material
Source: publisher figshare collection journal article supplement (https://diabetesjournals.figshare.com/articles/dataset/_/12933737)
Supplement: Supplementary file 2 [file 2]

**Table S1. Study design, number of individuals and sample quality control for ExomeChip study cohorts**

| Study                |                                               | Study design                  | Ethnicity                                       | Total sample size (N) | Sample QC  |                                                                                                                                                                                                                                                                                                                                                                                                                                                                                                                                                                                                                                                                                                                                                                                                                                                                                                                                                                                                                                | Samples in analyses (N) | BMI assessment method | References                                                                                                                                        |
|----------------------|-----------------------------------------------|-------------------------------|-------------------------------------------------|-----------------------|------------|--------------------------------------------------------------------------------------------------------------------------------------------------------------------------------------------------------------------------------------------------------------------------------------------------------------------------------------------------------------------------------------------------------------------------------------------------------------------------------------------------------------------------------------------------------------------------------------------------------------------------------------------------------------------------------------------------------------------------------------------------------------------------------------------------------------------------------------------------------------------------------------------------------------------------------------------------------------------------------------------------------------------------------|-------------------------|-----------------------|---------------------------------------------------------------------------------------------------------------------------------------------------|
| Short name           | Full name                                     |                               |                                                 |                       | Call rate* | Other exclusions                                                                                                                                                                                                                                                                                                                                                                                                                                                                                                                                                                                                                                                                                                                                                                                                                                                                                                                                                                                                               |                         |                       |                                                                                                                                                   |
| <b>ARIC</b>          | Atherosclerosis Risk in Communities Study     | Population-based              | European American (EA)<br>African American (AA) | 462                   | ≥ 95%      | 1) call rate <95%, 2) PCA outliers, 3)sex mismatch , 4) inbreeding coefficient +/-6SD from mean of ancestry distribution, 5) first degree relatedness; 6) comparison with GWAS data, exclude if >40% mismatch, 7) (p10GC) genotype quality score, representing the 10th percentile of the distribution of GenCall scores across all SNPs, 8) missing leptin, adiponectin, or BMI measures (only exclude from analyses missing respective phenotype trait)                                                                                                                                                                                                                                                                                                                                                                                                                                                                                                                                                                      | 340                     | Measured              | <b>PMID: 2646917</b><br><b>PMID: 2387450</b><br><b>PMCID: PMC3709915</b><br><b>PMID: 12829649</b>                                                 |
| <b>CHS EA and AA</b> | Cardiovascular Health Study                   | Population-based              | European American (EA)<br>African-American (AA) | 5088                  | ≥ 95%      | Following the central QC and joint variant calling, additional QC steps were applied to the CHS data using PLINK. SNPs with a missingness rate of >95% were removed and individuals meeting the following criteria were excluded from analysis. We further excluded individuals with low P10GC call, a missing genotype rate of > 97%, gender mis-matches identified by X chromosome homozygosity rates. The sample was limited to those of self-described European-ancestry (EA) and African-American (AA) participants. Principal components analysis was performed using a subset of common LD-pruned variants from the Exome Chip both for the full sample as well as in EA and AA strata. Individuals whose full-sample first principal component suggested a different ancestry from their self-reported ancestry were excluded as were individuals who were outliers for the first 10 ancestry-specific principal components. Pair-wise IBD measures were calculated and outliers with high levels of IBD were removed. | 5044                    | Measured              | <b>PMID: 23874508</b><br><b>PMID: 1669507</b>                                                                                                     |
| <b>CLHNS</b>         | Cebu Longitudinal Health and Nutrition Survey | Population Based Longitudinal | Filipino                                        | 1799                  | ≥98%       | 1) Missing study specific covariates (household assets or household income)                                                                                                                                                                                                                                                                                                                                                                                                                                                                                                                                                                                                                                                                                                                                                                                                                                                                                                                                                    | 1,792                   | Measured              | <b>PMID: 20507864</b>                                                                                                                             |
| <b>Ely</b>           | Ely study                                     | Longitudinal cohort study     | European ancestry                               | 1592                  | > 98%      | 1) Heterozygosity check, 2) Ethnic outliers, 3) Duplicate individuals, 4) Sex discrepancy, 5) Unusually high number of singleton genotypes, 6) impossible IBD values, 7) phenotype missing                                                                                                                                                                                                                                                                                                                                                                                                                                                                                                                                                                                                                                                                                                                                                                                                                                     | 1,432                   | Measured              | <b>PMID:17257284</b>                                                                                                                              |
| <b>ERF study</b>     | Erasmus Rucphen Family study                  | Family-based                  | White European                                  | 2963                  | ≥ 95%      | --                                                                                                                                                                                                                                                                                                                                                                                                                                                                                                                                                                                                                                                                                                                                                                                                                                                                                                                                                                                                                             | 1146                    | Measured              | <a href="http://www.erasmusmc.nl/klinische_genetica/research/intro/genepi/">http://www.erasmusmc.nl/klinische_genetica/research/intro/genepi/</a> |
| <b>FAMHS</b>         | Family Heart Study                            | Family-based                  | White European                                  | --                    | ≥ 98%      | 1) Variants with missing rate > 5% (based on aggregate data)<br>2) p <sub>HWE</sub> <1e-6<br>3) Mendelian errors<br>4) minor allele count (MAC)<5 for variant-wise tests                                                                                                                                                                                                                                                                                                                                                                                                                                                                                                                                                                                                                                                                                                                                                                                                                                                       | 1505                    | Measured              | <b>PMID:8651220</b>                                                                                                                               |
| <b>Fenland-CE</b>    | Fenland Study                                 | Population-based              | European ancestry                               | 1077                  | > 98%      | Heterozygosity check; Ethnic outliers; sex discrepancy; unusually high number of singleton genotypes; impossible IBD values; phenotype missing; excluding overlap exomechip samples                                                                                                                                                                                                                                                                                                                                                                                                                                                                                                                                                                                                                                                                                                                                                                                                                                            | 368                     | Measured              | <b>PMID: 20519560</b>                                                                                                                             |

|                                   |                                                                                                                 |                                                 |                                                                                      |             |       |                                                                                                                                                                                                                                                                                                                                                                                |                                             |          |                        |
|-----------------------------------|-----------------------------------------------------------------------------------------------------------------|-------------------------------------------------|--------------------------------------------------------------------------------------|-------------|-------|--------------------------------------------------------------------------------------------------------------------------------------------------------------------------------------------------------------------------------------------------------------------------------------------------------------------------------------------------------------------------------|---------------------------------------------|----------|------------------------|
| <b>Fenland-Exomechip</b>          | Fenland Study                                                                                                   | Population-based                                | White European                                                                       | 1650        | > 98% | 1) heterozygosity outliers (>3.5 SDs), 2) ethnic outliers, 3) sex discrepancy, 4) unusually high number of singleton genotypes, 5) related (IBD > 0.1875)                                                                                                                                                                                                                      | 1342                                        | Measured | <b>PMID: 20519560</b>  |
| <b>FHS</b>                        | Framingham Heart Study                                                                                          | Family-based                                    | White European                                                                       | 8153        | ≥ 97% | 1) Missing GWAS PCs, 2) Ethnic outlier, 3) Missing trait or covariate                                                                                                                                                                                                                                                                                                          | 7458                                        | Measured | <b>PMID: 23874508</b>  |
| <b>FINRISK 1997</b>               | Finland National FINRISK Health Survey 1997                                                                     | Population-based                                | White European                                                                       | 8325 (4006) | ≥ 95% | 1) Missing leptin or adiponectine levels, 2) Missing BMI, 3)Pregnancy                                                                                                                                                                                                                                                                                                          | 3917                                        | Measured | <b>PMID: 29165699</b>  |
| <b>FINRISK 2007</b>               | Finland National FINRISK Health Survey 2007                                                                     | Population-based                                | White European                                                                       | 6086 (3465) | ≥ 95% | 1) Missing leptin or adiponectin levels, 2) Missing BMI, height or weight, 3) Missing fat free mass or fat mass, 4) Pregnancy                                                                                                                                                                                                                                                  | 2945                                        | Measured | <b>PMID: 29158543</b>  |
| <b>HABC AA</b>                    | Health, aging and body composition study                                                                        | Population-based                                | African American ancestry                                                            | 1139        | > 95% | 1) missing data, 2) relatedness, 3) acestry outliers, 4) heterozygosity outliers                                                                                                                                                                                                                                                                                               | 1060                                        | Measured | --                     |
| <b>HABC EA</b>                    | Health, aging and body composition study                                                                        | Population-based                                | European ancestry                                                                    | 1663        | > 95% | 1) missing data, 2) relatedness , 3) acestry outliers, 4) heterozygosity outliers                                                                                                                                                                                                                                                                                              | 1572                                        | Measured | --                     |
| <b>Inter99</b>                    | Inter99                                                                                                         | Population-based                                | European                                                                             | 6141        | ≥ 98% | 1) Missing body weight and height. 2) Heterozygosity were calculated separately for maf < 1% and maf > 1% and samples were dropped judged by plots, 3) Cryptic relatedness (related to 20 or more individuals), 3) Technical duplicates , 4) Non-European population outliers from PCA plot (based on AIM SNPs), 5) Sex discrepancy                                            | 5594                                        | Measured | <b>PMID: 14663300</b>  |
| <b>JHS</b>                        | Jackson Heart Study                                                                                             | Population-based cohort with subset of families | African American                                                                     | 2803        | ≥ 95% | 1) Missing outcome or covariate, 2) Heterozygosity, 3) PC outlier 4) Half of overlap with ARIC African Americans (coordinated with ARIC)                                                                                                                                                                                                                                       | 2312                                        | Measured | <b>PMID: 16320381</b>  |
| <b>KORA</b>                       | Kooperative Gesundheitsforschung in der Region Augsburg (Cooperative Health Research in the Region of Augsburg) | Population-based                                | White European                                                                       | 2921        | ≥98%  | 1) excess heterozygosity [i.e.  het_rate  >  mean+/-5sd ], 2) sex-check based on y-chromosome (remove men with <50% and women with >50% calls on y-chromosome), 3) remove of HAPMAP-samples 4) remove duplicates (keep sample with higher callrate), 5) remove samples with genetic inconsistencies with other genotyping / indication for contamination / population outliers | 2916                                        | Measured | --                     |
| <b>Leipzig-adults</b>             | Leipzig Adults Study                                                                                            | Population-based                                | White European                                                                       | 902         | ≥ 99% | 1) Missing phenotype, 2) Heterozygosity, 3) Non-European population outliers, 4) Technical duplicates with lower call rate 5) Sex discrepancy                                                                                                                                                                                                                                  | 902                                         | Measured | <b>PMID: 20935630</b>  |
| <b>MESA CAU, CHN, AFA and HIS</b> | Multi-Ethnic Study of Atherosclerosis (MESA) Cohort                                                             | Population-based                                | Caucasia n;Chines e;Hispani c;African-American were recruited from six field centers | 6375        | ≥ 95% | 1) Ethnic outliers, 2) duplicates, 3) gender mismatch, 4) Phenoty outliers                                                                                                                                                                                                                                                                                                     | CAU 2497<br>AFA 1655<br>CHN 769<br>HIS 1435 | Measured | --                     |
| <b>NEO Study</b>                  | The Netherlands Epidemiology of Obesity Study                                                                   | Population-based                                | European ancestry                                                                    | 6.604       | ≥ 98% | 1) remove duplicate/swap samples, 2) remove samples with gender mismatch, 3) remove outliers in PCA                                                                                                                                                                                                                                                                            | 6.127                                       | Measured | <b>PMID: 23576214]</b> |

|                      |                                                                     |                        |                  |        |       |                                                                                                                                                                                                          |      |               |                       |
|----------------------|---------------------------------------------------------------------|------------------------|------------------|--------|-------|----------------------------------------------------------------------------------------------------------------------------------------------------------------------------------------------------------|------|---------------|-----------------------|
| <b>OMICS-Fenland</b> | Fenland Study                                                       | Population-based       | White European   | 8994   | > 97% | 1) Heterozygosity check, 2) Ethnic outliers, 3) sex discrepancy, 4) unusually high number of singleton genotypes, 5) impossible IBD values, 6) phenotype missing, 7) excluding overlap exomechip samples | 7845 | Measured      | <b>PMID: 20519560</b> |
| <b>PIVUS</b>         | Prospective Investigation of the Vasculature in Uppsala Seniors     | Population-based       | White European   | 961    | ≥ 99% | 1) Missing phenotype, 2) Heterozygosity, 3) Non-European population outliers, 4) technical duplicates with lower call rate 5) Sex discrepancy                                                            | 961  | Measured      | <b>PMID: 16141402</b> |
| <b>RAINE Study</b>   | Western Australian Pregnancy Cohort (RAINE) Study                   | Population-based       | White European   | 1527   | ≥95%  | 1) Samepl discordance with GWAS data, 2) Heterozygosity 3) Missing body weight and height, 4) Did not participant in DEXA scan                                                                           | 1006 | Measured      | --                    |
| <b>RISC</b>          | Relationship between Insulin Sensitivity and Cardiovascular disease | Population-based       | White European   | 313    | 0.99  | 1) heterozygosity, 2) duplicates, 3) relatedness                                                                                                                                                         | 313  | Measured      | <b>PMID:14968294</b>  |
| <b>RSI</b>           | Rotterdam Study                                                     | Population-based       | White European   | 3163   | ≥ 98% | 1) Heterozygosity, 2) gender-check                                                                                                                                                                       | 554  | Measured      | <b>PMID: 29064009</b> |
| <b>SHIP-TREND</b>    | Study of Health in Pomerania - TREND                                | Population-based       | White European   | 4270   | ≥ 98% | 1) missing data, 2) duplicate samples (by estimated IBD), 3) reported and genotyped sex mismatch, 4) Heterozygosity                                                                                      | 4149 | Measured      | <b>PMID: 20167617</b> |
| <b>TwinsUK</b>       | TwinsUK                                                             | twin study             | White European   | 4081   | ≥ 95% | 1) missing phenotype, 2) sample call rate                                                                                                                                                                | 1864 | Measured      |                       |
| <b>WGHS</b>          | Women's Genome Health Study                                         | population based trial | European         | 22618  | >98%  | 1) Heterozygosity, 2) Batch effects, 3) see also Grove et al. (PLoS One (2013) doi: 10.1371/journal.pone.0068095)                                                                                        | 789  | Self-reported | <b>PMID: 18070814</b> |
| <b>WHI</b>           | Women's Health Initiative                                           | Cohort                 | European         | 21,857 | ≥ 95% | 1) Unexpected Duplicates, 2) PC ancestry outliers, 3) Missing body weight and height                                                                                                                     | 5886 | Measured      | <b>PMID: 9492970</b>  |
| <b>WHI</b>           | Women's Health Initiative                                           | Cohort                 | African American | 3,516  | ≥ 95% | 1) Unexpected Duplicates, 2) PC ancestry outliers, 3) Missing body weight and height                                                                                                                     | 884  | Measured      | <b>PMID: 9492970</b>  |
| <b>YFS</b>           | The Cardiovascular Risk in Young Finns Study                        | Population-based       | White European   | 1998   | ≥ 95% | 1) Pregnancy, 2) Heterozygosity, 3) Gender discrepancy, 4) MDS outliers                                                                                                                                  | 1681 | Measured      | <b>PMID: 18263651</b> |

\* Call rate to exclude individuals for whom genotyping success rate is less than a certain percentage (to exclude 'bad' samples/DNA)

\*\*Exome-chip samples from this study

**Table S2. Study-specific descriptive statistics of ExomeChip cohorts.**

| Study <sup>a</sup> | Trait                    | Men |      |      |        |      |       | Women |       |       |        |      |        |
|--------------------|--------------------------|-----|------|------|--------|------|-------|-------|-------|-------|--------|------|--------|
|                    |                          | n   | mean | SD   | median | min  | max   | n     | mean  | SD    | median | min  | max    |
| ARIC               | Age (yrs)                | 249 | 53.8 | 5.7  | 53     | 45   | 65    | 342   | 53.2  | 5.6   | 53     | 44   | 65     |
|                    | BMI (kg/m <sup>2</sup> ) | 249 | 28.7 | 4.04 | 28.2   | 20.4 | 44.9  | 342   | 28.1  | 5.6   | 26.8   | 18.1 | 49.5   |
|                    | Leptin levels (ng/ml)    | 249 | 8.4  | 9.6  | 5.9    | 0.5  | 105.3 | 342   | 25.6  | 22.1  | 18.7   | 0.7  | 147.3  |
| CHS-EA             | Age (yrs)                | 484 | 72.9 | 5.4  | 72     | 65   | 91    | 533   | 72.6  | 4.9   | 72     | 65   | 92     |
|                    | BMI (kg/m <sup>2</sup> ) | 482 | 26.4 | 3.6  | 26     | 16.9 | 39.4  | 531   | 26.3  | 4.9   | 25.5   | 15.6 | 47.7   |
|                    | Leptin levels (ng/ml)    | 484 | 9.5  | 10.4 | 7.2    | 1.3  | 100   | 533   | 27.2  | 22.6  | 19.2   | 1.4  | 100    |
| CHS-AA             | Age (yrs)                | 88  | 73.6 | 5.7  | 73     | 65   | 89    | 121   | 73.7  | 5.4   | 73     | 66   | 90     |
|                    | BMI (kg/m <sup>2</sup> ) | 88  | 26.4 | 3.8  | 26.1   | 18.2 | 37.7  | 121   | 29.6  | 5.3   | 29.3   | 18.3 | 44.5   |
|                    | Leptin levels (ng/ml)    | 88  | 9.6  | 8.8  | 7.1    | 1.3  | 46.8  | 121   | 41.7  | 26.6  | 36.1   | 1.4  | 100    |
| CLHNS              | Age (yrs)                | -   | -    | -    | -      | -    | -     | 1792  | 48.5  | 6.1   | 47.7   | 35.7 | 69.3   |
|                    | BMI (kg/m <sup>2</sup> ) | -   | -    | -    | -      | -    | -     | 1780  | 21.3  | 4.4   | 24.1   | 12.3 | 42.1   |
|                    | Leptin levels (ng/ml)    | -   | -    | -    | -      | -    | -     | 1792  | 25.5  | 19.4  | 21.3   | 0    | 154.2  |
| Ely                | Age (yrs)                | 742 | 61.5 | 9.1  | 61.6   | 35.7 | 77.4  | 849   | 60.8  | 9.3   | 60.2   | 36.3 | 78.9   |
|                    | BMI (kg/m <sup>2</sup> ) | 742 | 27.4 | 3.9  | 26.8   | 16   | 45.8  | 849   | 27.3  | 5.4   | 26.3   | 16.9 | 59.3   |
|                    | Leptin levels (ng/ml)    | 658 | 9.2  | 8.1  | 7.1    | 0.1  | 63.1  | 769   | 33    | 26.7  | 25.7   | 0.7  | 198    |
| ERF study          | Age (yrs)                | 262 | 49.4 | 14.2 | 49.6   | 17.6 | 81.8  | 316   | 50.0  | 15.4  | 51.0   | 18.6 | 81.4   |
|                    | BMI (kg/m <sup>2</sup> ) | 262 | 27.5 | 5.0  | 26.9   | 17.4 | 50.8  | 316   | 27.1  | 5.2   | 26.5   | 17.7 | 61.8   |
|                    | Leptin levels (ng/ml)    | 262 | 27.7 | 43.8 | 16.8   | 0.6  | 535.9 | 316   | 91.3  | 89.1  | 60.0   | 0.0  | 599.3  |
| FAMHS EA           | Age (yrs)                | 737 | 52.5 | 13.9 | 53.9   | 25.2 | 91.0  | 768   | 52.8  | 13.1  | 53.9   | 25.2 | 88.7   |
|                    | BMI (kg/m <sup>2</sup> ) | 737 | 27.8 | 5.0  | 27.0   | 16.0 | 49.6  | 768   | 28.1  | 6.9   | 26.4   | 16.1 | 55.1   |
|                    | Leptin levels (ng/ml)    | 737 | 8.5  | 7.0  | 6.6    | 1.1  | 77.1  | 768   | 23.4  | 17.9  | 18.4   | 2.2  | 123.6  |
| Fenland-CE         | Age (yrs)                | 164 | 49.6 | 7.0  | 50.4   | 36.1 | 61.6  | 204   | 49.3  | 7.6   | 50.1   | 30.7 | 62.3   |
|                    | BMI (kg/m <sup>2</sup> ) | 164 | 27.4 | 4.1  | 26.9   | 18.2 | 42.3  | 204   | 26.6  | 4.8   | 25.4   | 19.1 | 45.5   |
|                    | Leptin levels (ng/ml)    | 164 | 7.46 | 7.26 | 5.70   | 0.50 | 57.90 | 204   | 23.69 | 19.80 | 16.75  | 2.20 | 112.00 |
| Fenland-Exomechip  | Age (yrs)                | 621 | 48.5 | 7.2  | 48.5   | 31.3 | 61.5  | 713   | 48.6  | 7.2   | 49.0   | 33.7 | 61.1   |
|                    | BMI (kg/m <sup>2</sup> ) | 621 | 27.5 | 4.0  | 27.1   | 18.0 | 46.6  | 713   | 26.6  | 5.5   | 25.2   | 16.6 | 59.9   |

|                |                          |      |      |      |      |      |       |        |      |      |      |      |       |
|----------------|--------------------------|------|------|------|------|------|-------|--------|------|------|------|------|-------|
|                | Leptin levels (ng/ml)    | 621  | 7.7  | 7.5  | 5.9  | 0.1  | 74.5  | 713    | 24.2 | 21.3 | 17.7 | 0.5  | 169.0 |
| Fenland-OMICS  | Age (yrs)                | 3035 | 48.3 | 7.4  | 48.6 | 30.9 | 62.3  | 3376   | 48.4 | 7.2  | 48.7 | 30.5 | 62.8  |
|                | BMI (kg/m <sup>2</sup> ) | 3035 | 27.3 | 4.2  | 26.8 | 15.3 | 50.6  | 3376   | 26.4 | 5.2  | 25.4 | 14.5 | 58.7  |
|                | Leptin levels (ng/ml)    | 3035 | 7.7  | 7.3  | 5.6  | 0.1  | 72.1  | 3376   | 23.3 | 20.3 | 17.3 | 0.1  | 199.0 |
| FHS            | Age (yrs)                | 1800 | 40.3 | 8.9  | 40.0 | 19.0 | 72.0  | 2034   | 40.0 | 8.8  | 40.0 | 19.0 | 70.0  |
|                | BMI (kg/m <sup>2</sup> ) | 1800 | 27.9 | 4.7  | 27.3 | 16.4 | 56.5  | 2030   | 26.0 | 6.1  | 24.4 | 15.6 | 60.6  |
|                | Leptin levels (ng/ml)    | 1800 | 6.1  | 6.2  | 4.3  | 0.2  | 64.2  | 2034   | 18.2 | 17.1 | 12.3 | 0.7  | 110.3 |
| FINRISK97      | Age (yrs)                | 1786 | 46.1 | 13.1 | 45.3 | 24.2 | 74.1  | 2134.0 | 44.8 | 12.4 | 44.2 | 24.2 | 73.8  |
|                | BMI (kg/m <sup>2</sup> ) | 1783 | 26.6 | 3.9  | 26.1 | 14.7 | 47.1  | 2133.0 | 26.0 | 4.9  | 25.1 | 16.6 | 51.6  |
|                | Leptin levels (ng/ml)    | 1761 | 6.2  | 6.2  | 4.3  | 1.6  | 76.2  | 2111.0 | 18.0 | 14.0 | 14.0 | 1.6  | 100.0 |
| FINRISK07      | Age (yrs)                | 1298 | 52.2 | 13.6 | 53.0 | 25.0 | 74.0  | 1647.0 | 51.0 | 15.5 | 51.0 | 25.0 | 74.0  |
|                | BMI (kg/m <sup>2</sup> ) | 1284 | 26.9 | 4.1  | 26.3 | 15.7 | 62.8  | 1635.0 | 26.6 | 5.4  | 25.4 | 15.9 | 52.7  |
|                | Leptin levels (ng/ml)    | 1284 | 7.8  | 8.2  | 5.3  | 0.1  | 89.1  | 1602.0 | 19.1 | 15.8 | 14.9 | 0.5  | 100.0 |
| HABC AA        | Age (yrs)                | 457  | 73.5 | 2.8  | 73.0 | 69.0 | 79.0  | 603    | 73.3 | 2.9  | 73.0 | 68.0 | 80.0  |
|                | BMI (kg/m <sup>2</sup> ) | 457  | 27.1 | 4.2  | 26.8 | 14.9 | 43.2  | 603    | 29.4 | 5.6  | 29.0 | 14.6 | 47.5  |
|                | Leptin levels (ng/ml)    | 457  | 8.1  | 7.2  | 6.4  | 0.0  | 60.3  | 603    | 24.8 | 15.0 | 22.3 | 0.3  | 99.3  |
| HABC EA        | Age (yrs)                | 825  | 73.9 | 2.9  | 74   | 69   | 80    | 747    | 73.6 | 2.8  | 73   | 69   | 80    |
|                | BMI (kg/m <sup>2</sup> ) | 825  | 27   | 3.7  | 26.6 | 17.6 | 44.2  | 747    | 26.1 | 4.5  | 25.6 | 15.6 | 44.7  |
|                | Leptin levels (ng/ml)    | 825  | 7.7  | 6.8  | 6    | 0.2  | 59.1  | 747    | 18.9 | 14   | 14.8 | 0.3  | 86.9  |
| Inter99        | Age (yrs)                | 2675 | 46.6 | 7.8  | 45.2 | 29.9 | 61.1  | 2828   | 45.8 | 8.0  | 45.1 | 29.7 | 61.3  |
|                | BMI (kg/m <sup>2</sup> ) | 2674 | 26.8 | 4.0  | 26.3 | 17.1 | 56.9  | 2825   | 25.8 | 5.0  | 24.7 | 15.2 | 55.7  |
|                | Leptin levels (ng/ml)    | 2675 | 4.6  | 5.1  | 3.2  | 0.2  | 70.7  | 2828   | 15.1 | 16.1 | 10.3 | 0.4  | 260.6 |
| JHS            | Age (yrs)                | 861  | 51.9 | 12.8 | 51.0 | 21.0 | 81.0  | 1434   | 53.8 | 12.6 | 53.0 | 21.0 | 91.0  |
|                | BMI (kg/m <sup>2</sup> ) | 861  | 30.4 | 30.4 | 29.2 | 16.4 | 66.1  | 1434   | 31.9 | 6.2  | 31.5 | 16.0 | 91.8  |
|                | Leptin levels (ng/ml)    | 861  | 12.0 | 11.5 | 8.8  | 0.8  | 106.9 | 1434   | 36.1 | 21.5 | 32.7 | 1.4  | 291.0 |
| KORA           | Age (yrs)                | 1415 | 49.6 | 13.4 | 50.0 | 25.0 | 74.0  | 1506   | 48.4 | 13.2 | 48.0 | 25.0 | 74.0  |
|                | BMI (kg/m <sup>2</sup> ) | 1411 | 27.4 | 3.8  | 26.9 | 16.3 | 55.1  | 1491   | 26.8 | 5.1  | 25.9 | 15.8 | 51.2  |
|                | Leptin levels (ng/ml)    | 1410 | 9.4  | 10.3 | 6.3  | 0.0  | 140.0 | 1506   | 27.9 | 23.6 | 20.5 | 0.3  | 212.0 |
| Leipzig-adults | Age (yrs)                | 223  | 42.3 | 17.1 | 40.5 | 18.0 | 99.0  | 276    | 41.5 | 16.6 | 38.0 | 18.0 | 89.0  |
|                | BMI (kg/m <sup>2</sup> ) | 223  | 35.4 | 12.6 | 32.6 | 18.8 | 120.4 | 276    | 36.1 | 12.6 | 33.6 | 14.7 | 70.0  |
|                | Leptin levels (ng/ml)    | 223  | 14.3 | 13.8 | 10.1 | 0.2  | 62.1  | 276    | 35.1 | 23.5 | 34.1 | 0.2  | 142.9 |

|             |                          |      |      |      |      |      |       |      |      |      |      |      |       |
|-------------|--------------------------|------|------|------|------|------|-------|------|------|------|------|------|-------|
| MESA CAU    | Age (yrs)                | 395  | 62.6 | 10.2 | 63.0 | 45.0 | 84.0  | 360  | 62.9 | 9.2  | 62.5 | 45.0 | 84.0  |
|             | BMI (kg/m <sup>2</sup> ) | 395  | 28.2 | 4.0  | 27.6 | 19.9 | 41.1  | 360  | 27.5 | 5.7  | 26.5 | 16.9 | 45.7  |
|             | Leptin levels (ng/ml)    | 395  | 10.4 | 10.6 | 7.1  | 0.2  | 79.9  | 360  | 27.2 | 23.0 | 20.7 | 1.1  | 156.5 |
| MESA CHN    | Age (yrs)                | 129  | 62.6 | 10.7 | 63.0 | 45.0 | 82.0  | 115  | 62.3 | 9.7  | 61.0 | 44.0 | 84.0  |
|             | BMI (kg/m <sup>2</sup> ) | 129  | 24.3 | 2.8  | 23.9 | 16.8 | 32.3  | 115  | 24.4 | 3.2  | 24.6 | 17.8 | 33.0  |
|             | Leptin levels (ng/ml)    | 129  | 5.8  | 5.8  | 3.7  | 0.4  | 36.5  | 115  | 18.7 | 16.4 | 13.2 | 1.2  | 113.9 |
| MESA AFA    | Age (yrs)                | 158  | 61.7 | 9.7  | 62   | 45   | 83    | 180  | 63.6 | 9.6  | 64   | 46   | 84    |
|             | BMI (kg/m <sup>2</sup> ) | 158  | 28.6 | 4.5  | 28.3 | 19   | 46.9  | 180  | 30.3 | 5.7  | 29.4 | 19.7 | 47.3  |
|             | Leptin levels (ng/ml)    | 158  | 15.3 | 17.3 | 9.3  | 0.2  | 150   | 180  | 41.6 | 29.4 | 37.3 | 2.8  | 190.9 |
| MESA HIS    | Age (yrs)                | 246  | 60.0 | 9.9  | 59.0 | 44.0 | 82.0  | 242  | 62.3 | 9.2  | 63.0 | 45.0 | 82.0  |
|             | BMI (kg/m <sup>2</sup> ) | 246  | 29.0 | 4.5  | 28.7 | 19.4 | 45.8  | 242  | 30.1 | 5.5  | 29.6 | 18.3 | 52.5  |
|             | Leptin levels (ng/ml)    | 246  | 11.0 | 11.0 | 7.1  | 0.0  | 66.8  | 242  | 33.8 | 25.9 | 27.8 | 0.9  | 224.9 |
| NEO study   | Age (yrs)                | 2941 | 56.2 | 6.0  | 57.0 | 44.0 | 66.0  | 3186 | 55.8 | 5.9  | 56.0 | 44.0 | 66.0  |
|             | BMI (kg/m <sup>2</sup> ) | 2941 | 29.8 | 3.9  | 29.3 | 19.3 | 54.4  | 3186 | 30.3 | 5.5  | 29.8 | 17.2 | 61.2  |
|             | Leptin levels (ng/ml)    | 2929 | 12.9 | 9.2  | 10.5 | 0.5  | 98.6  | 3172 | 36.0 | 23.1 | 31.9 | 0.5  | 262.0 |
| PIVUS       | Age (yrs)                | 479  | 70.1 | 0.2  | 70.1 | 69.8 | 72.3  | 466  | 70.3 | 0.1  | 70.3 | 69.9 | 70.8  |
|             | BMI (kg/m <sup>2</sup> ) | 479  | 27.0 | 3.7  | 26.8 | 17.7 | 43.4  | 466  | 27.1 | 4.9  | 26.5 | 16.6 | 49.8  |
|             | Leptin levels (ng/ml)    | 479  | 8.0  | 5.6  | 6.5  | 1.1  | 41.8  | 466  | 19.4 | 11.9 | 17.0 | 1.7  | 90.0  |
| RAINE Study | Age (yrs)                | 467  | 20.1 | 0.4  | 20.0 | 19.4 | 22.1  | 412  | 20.0 | 0.4  | 19.9 | 18.3 | 21.9  |
|             | BMI (kg/m <sup>2</sup> ) | 467  | 24.5 | 4.3  | 23.8 | 16.9 | 48.9  | 412  | 24.2 | 5.0  | 23.0 | 15.4 | 46.5  |
|             | Leptin levels (ng/ml)    | 467  | 6.1  | 9.9  | 3.4  | 0.1  | 162.1 | 412  | 26.2 | 18.7 | 21.5 | 2.2  | 98.2  |
| RISC        | Age (yrs)                | 156  | 44.7 | 8.3  | -    | -    | -     | 157  | 45.8 | 7.9  | -    | -    | -     |
|             | BMI (kg/m <sup>2</sup> ) | 156  | 26.0 | 3.5  | 26.0 | 17.9 | 39.3  | 157  | 25.2 | 4.5  | 24.3 | 16.9 | 42.9  |
|             | Leptin levels (ng/ml)    | 156  | 5.5  | 5.6  | 4.1  | 0.0  | 35.7  | 157  | 20.9 | 16.6 | 16.1 | 0.9  | 110.0 |
| RSI         | Age (yrs)                | 273  | 66.7 | 7.1  | 66.1 | 55.2 | 88.7  | 279  | 69.2 | 7.6  | 69.4 | 55.1 | 90.8  |
|             | BMI (kg/m <sup>2</sup> ) | 268  | 25.7 | 2.8  | 25.8 | 18.4 | 35.3  | 272  | 26.8 | 4.6  | 26.0 | 18.2 | 59.5  |
|             | Leptin levels (ng/ml)    | 273  | 5.6  | 4.5  | 4.0  | 0.4  | 25.2  | 281  | 17.9 | 13.1 | 15.0 | 0.7  | 61.4  |
| SHIP-TREND  | Age (yrs)                | 410  | 50.5 | 14.1 | 51.0 | 22.0 | 80.0  | 545  | 50.0 | 13.3 | 50.0 | 20.0 | 81.0  |
|             | BMI (kg/m <sup>2</sup> ) | 410  | 28.1 | 3.7  | 28.0 | 19.2 | 43.9  | 545  | 27.0 | 5.1  | 26.3 | 18.5 | 53.7  |
|             | Leptin levels (ng/ml)    | 410  | 7.4  | 5.6  | 6.2  | 1.0  | 43.1  | 545  | 21.8 | 15.7 | 18.0 | 1.9  | 165.0 |
| TwinsUK     | Age (yrs)                | -    | -    | -    | -    | -    | -     | 1015 | 48.8 | 11.2 | 49.1 | 18.4 | 73.5  |

|               |                          |     |      |     |      |      |      |      |      |      |      |      |       |
|---------------|--------------------------|-----|------|-----|------|------|------|------|------|------|------|------|-------|
|               | BMI (kg/m <sup>2</sup> ) | -   | -    | -   | -    | -    | -    | 1015 | 25.2 | 4.5  | 24.3 | 15.1 | 46.0  |
|               | Leptin levels (ng/ml)    | -   | -    | -   | -    | -    | -    | 1015 | 16.9 | 12.0 | 13.6 | 1.1  | 79.4  |
| <b>WGHS</b>   | Age (yrs)                | -   | -    | -   | -    | -    | -    | 789  | 58.8 | 8.5  | 58.0 | 45.0 | 87.0  |
|               | BMI (kg/m <sup>2</sup> ) | -   | -    | -   | -    | -    | -    | 789  | 25.9 | 4.7  | 25.0 | 14.6 | 49.9  |
|               | Leptin levels (ng/ml)    | -   | -    | -   | -    | -    | -    | 789  | 22.8 | 16.9 | 19.1 | 1.4  | 145.0 |
| <b>WHI EA</b> | Age (yrs)                | -   | -    | -   | -    | -    | -    | 1901 | 68.3 | 6.4  | 69.0 | 50.0 | 79.0  |
|               | BMI (kg/m <sup>2</sup> ) | -   | -    | -   | -    | -    | -    | 1901 | 27.7 | 6.6  | 26.5 | 15.7 | 159.8 |
|               | Leptin levels (ng/ml)    | -   | -    | -   | -    | -    | -    | 1901 | 20.9 | 18.6 | 16.2 | 0.2  | 148.8 |
| <b>WHI AA</b> | Age (yrs)                | -   | -    | -   | -    | -    | -    | 468  | 65.5 | 6.8  | 66.0 | 50.0 | 79.0  |
|               | BMI (kg/m <sup>2</sup> ) | -   | -    | -   | -    | -    | -    | 468  | 30.2 | 7.7  | 29.1 | 17.2 | 141.0 |
|               | Leptin levels (ng/ml)    | -   | -    | -   | -    | -    | -    | 468  | 33.0 | 20.4 | 29.1 | 2.1  | 117.2 |
| <b>YFS</b>    | Age (yrs)                | 759 | 32   | 5   | 33   | 24   | 39   | 922  | 32.1 | 5    | 33   | 24   | 39    |
|               | BMI (kg/m <sup>2</sup> ) | 755 | 25.7 | 4   | 25.1 | 15.7 | 47.8 | 919  | 24.4 | 4.6  | 23.5 | 15.7 | 47.2  |
|               | Leptin levels (ng/ml)    | 759 | 5.4  | 4.2 | 4.3  | 0.8  | 32.1 | 922  | 15.2 | 9.7  | 13   | 1.5  | 63.3  |

\* only report descriptives for the individuals included in each of the analyses

CHS NOTE: For age and BMI, I included all individuals who are included in one or more of the analyses

CHS NOTE: For leptin and adiponectin, I included all individuals in the biggest analysis (not adjusted for fat percentage or BMI)

**Table S3. Information on genotyping methods, quality control of SNPs, imputation, and statistical analysis for ExomeChip study cohorts**

| Cohort                   | Genotyping Array                           | Genotype calling algorithm                                                                         | Principal components |                                           | Inclusion criteria |            |                      |                           | Association analyses              |                   |
|--------------------------|--------------------------------------------|----------------------------------------------------------------------------------------------------|----------------------|-------------------------------------------|--------------------|------------|----------------------|---------------------------|-----------------------------------|-------------------|
|                          |                                            |                                                                                                    | Software             | SNPs used from GWAS/ExomeCHIP/AI MS/Other | MAF                | Call rate* | P-value for HWE      | SNPs that met QC criteria | Polymorphic SNPs in meta-analysis | Analyses software |
| <b>ARIC</b>              | Illumina ExomeChip V1.0                    | GenTrain 2.0 clustering algorithm                                                                  | Eigensoft v3.0       | Exomchip (MAF>5%)                         | ≥ 0%               | ≥ 95%      | > 10 <sup>-6</sup>   | 237898 **                 | 163,162 (EA)                      | rvtests           |
| <b>CHS EA and AA</b>     | Illumina ExomeChip V1.0                    | --                                                                                                 | R                    | ExomeChip                                 | > 0%               | ≥ 97%      | No filter            | 227061                    | --                                | raremetalworker   |
| <b>CLHNS</b>             | Affymetrix 500K                            | Birdseed v2                                                                                        | MACH                 | GWAS/ExomeCHIP                            | ≥ 0%               | ≥95%       | > 10 <sup>-6</sup>   | 2304702                   | 28,560,246                        | mach2QTL          |
| <b>Ely</b>               | Illumina HumanCoreExome                    | GenCall                                                                                            | PLINK                | GWAS                                      | >0%                | >95%       | > 5x10 <sup>-6</sup> | 231349                    | 231349                            | RAREMETALWORKER   |
| <b>ERF study</b>         | Illumina HumanExome chip v1.1              | GenomeStudio v1.9. and zCall                                                                       | --                   | --                                        | >5%                | >95%       | > 10 <sup>-5</sup>   | --                        | 240017                            | rvtests           |
| <b>FAMHS</b>             | Illumina Human Exome 12v1.0 BeadChip       | Genome Studio via central CHARGE-S genotyping                                                      | EIGENSTRAT           | GWAS                                      | ≥0%                | ≥ 98%      | > 10 <sup>-6</sup>   | 237373 **                 | --                                | raremetalworker   |
| <b>Fenland-CE</b>        | Illumina HumanCoreExome                    | GenCall                                                                                            | PLINK v1.9beta       | GWAS                                      | >0%                | >95%       | > 10 <sup>-6</sup>   | 15083259                  | 234201                            | RAREMETALWORKER   |
| <b>Fenland-Exomechip</b> | Illumina ExomeChip v1.0                    | Gencall + zcall                                                                                    | PLINK v1.07          | ExomeChip                                 | ≥ 0%               | ≥97%       | > 10 <sup>-6</sup>   | 241979                    | 240859                            | RAREMETALWORKER   |
| <b>FHS</b>               | Illumina Infinium HumanExome BeadChip v1.0 | Illumina issued cluster file HumanExome-12v1.egt + zCall + CHARGE best practices and joint calling | EIGENSOFT            | GWAS                                      | ≥ 0%               | ≥ 97%      | No filter            | 237767                    | --                                | raremetalworker   |

|                                    |                                    |                                                                                                                       |                     |                                                                                                                                       |      |       |                    |        |        |                 |
|------------------------------------|------------------------------------|-----------------------------------------------------------------------------------------------------------------------|---------------------|---------------------------------------------------------------------------------------------------------------------------------------|------|-------|--------------------|--------|--------|-----------------|
| <b>FINRISK 1997</b>                | Illumina HumanHap 610k             |                                                                                                                       | PLINK               | ExomeCHIP                                                                                                                             | > 0% | ≥ 90% | > 10 <sup>-6</sup> | 509376 | 495420 | rvtests         |
| <b>FINRISK 2007</b>                | Illumina HumanHap 610k             |                                                                                                                       | PLINK               | ExomeCHIP                                                                                                                             | > 0% | ≥ 90% | > 10 <sup>-6</sup> | 509376 | 495420 | rvtests         |
| <b>HABC AA</b>                     | Illumina ExomeChip V1.0            | CHARGE protocol                                                                                                       | eignestrat          | AIMs                                                                                                                                  | ≥ 0% | >95%  | > 10 <sup>-6</sup> | 228554 | 228554 | rvtests         |
| <b>HABC EA</b>                     | Illumina ExomeChip V1.0            | CHARGE protocol                                                                                                       | eignestrat          | AIMs                                                                                                                                  | ≥ 0% | >95%  | > 10 <sup>-6</sup> | 228565 | 228565 | rvtests         |
| <b>Inter99</b>                     | Illumina HumanExome-12v1           | GenCall + Zcall                                                                                                       | PLINK               | AIM SNPs for outlier detection, ExomeCHIP fo adjustment                                                                               | > 0% | ≥ 98% | > 10 <sup>-4</sup> | 137187 | 137187 | RMW             |
| <b>JHS</b>                         | Illumina ExomeChip V1.0            | CHARGE joint calling (Illumina GenomeStudio v2011.1 software was utilized with the GenTrain 2.0 clustering algorithm) | Eigenstrat smartpca | Bi-allelic ExomeChip SNPs with MAF > 0.05, HWE p > 0.000001, callrate > 99%, pruned to be pairwise independent with r = 0.3 in plink. | > 0% | ≥ 95% | No filter          | 137716 | --     | rvtests         |
| <b>KORA</b>                        | Illumina ExomeChip V1.0            | GeneCall + Zcall (CHARGE Protocol)                                                                                    | genomestudio        | ExomeCHIP                                                                                                                             | > 0% | ≥98%  | ≥10 <sup>-8</sup>  | 1409   | 247868 | rvtests         |
| <b>Leipzig-adults</b>              | Illumina HumanExome-12v1_A         | GeneCall + Zcall (Oxford Protocol)                                                                                    | PLINK               | ExomeCHIP MAF>1%                                                                                                                      | > 0% | ≥ 99% | > 10 <sup>-4</sup> | 231460 | --     | RareMetalWorker |
| <b>MESA CAU, CHN, AFA, and HIS</b> | Illumina Exome Chip v1.0           | Illumina GenomeStudio2011.1                                                                                           | EIGENSTRAT          | ExomeCHIP                                                                                                                             | > 0% | ≥ 90% | > 10 <sup>-6</sup> | 238876 | 238876 | rvtests         |
| <b>NEO Study</b>                   | Illumina HumanCoreExomeChip-24V1.0 | GeneCall (SOP v5)                                                                                                     | PLINK               | Based on LD prune                                                                                                                     | > 0% | ≥ 98% | > 10 <sup>-6</sup> | 209874 | 209874 | rvtests         |
| <b>OMICS-Fenland</b>               | Affymetrix Axiom UKBiobank         | Axiom GT1                                                                                                             | PLINK v1.9beta      | GWAS                                                                                                                                  | > 0% | ≥ 95% | > 10 <sup>-6</sup> | 719871 | 58240  | RAREMETALWORKER |

|                    |                                     |                                                             |                               |           |      |                            |                    |        |         |                        |
|--------------------|-------------------------------------|-------------------------------------------------------------|-------------------------------|-----------|------|----------------------------|--------------------|--------|---------|------------------------|
| <b>PIVUS</b>       | Illumina HumanExome-12v1_A          | GeneCall + Zcall (Oxford Protocol)                          | plink/MDS                     | AIMS      | > 0% | ≥ 99%                      | > 10 <sup>-4</sup> | 233149 | --      | raremetalworker        |
| <b>RAINE Study</b> | Illumina HumanExome-12v1_A          | Illumina GenomeStudio GenTrain Clustering algorithm + zCall | EIGENSOFT - smartpca          | AIMS      | >0%  | >=95%                      | > 10 <sup>-4</sup> | 240806 | 240062  | rvtests                |
| <b>RISC</b>        | Illumina Human Exome Beadchip v1    | GenCall followed by zCall                                   | PLINK                         | ExomeCHIP | ≥ 0% | 0.99                       | > 10 <sup>-4</sup> | 236875 | 236871  | RMW                    |
| <b>RSI</b>         | Illumina ExomeChip V1.1             | GeneCall + Zcall (CHARGE Protocol)                          | PLINK                         | GWAS      | >0%  | ≥ 90%                      | > 10 <sup>-6</sup> | 237766 | 109402  | rvtests                |
| <b>SHIP-TREND</b>  | Illumina ExomeChip V1.0             | GeneCall (CHARGE JointCalling Clusterfile)                  | Illumina GenomeStudio v2011.1 | AIMs      | > 0% | ≥ 98% (together with SHIP) | > 10 <sup>-6</sup> | 238205 | --      | raremetalworker        |
| <b>TwinsUK</b>     | Illumina12v1-1_A                    | GeneCall                                                    | Plink                         | GWAS      | > 0% | ≥ 90%                      | > 10 <sup>-6</sup> | 222804 |         | raremetalworker 4.13.6 |
| <b>WGHS</b>        | Illumina HumanExome Beadchip v.1.1A | genomeStudio + zCall                                        | EIGENSTRAT                    | GWAS      | ≥ 0% | >95%                       | > 10 <sup>-6</sup> | 235667 | 234710  | raremetal              |
| <b>WHI</b>         | Illumina Human Exome BeadChip v1.0  | GenomeStudio v2010.3                                        | SNPRelate                     | ExomeCHIP | > 0% | ≥ 90%                      | > 10 <sup>-6</sup> | 246470 | 246,303 | rvtests                |
| <b>YFS</b>         | Illumina CoreExome v1.0b            | GenCall                                                     | PLINK                         | ExomeCHIP | > 0% | ≥ 95%                      | > 10 <sup>-6</sup> | 238194 | 237,852 | rvtest                 |

\* Call rate to exclude SNPs for which less than a certain percentage of individuals were successfully genotyped (i.e. to exclude 'bad' SNPs)

\*\* Includes monomorphic SNPs

**Table S4. Single-variant results in all statistical models for the leptin-associated loci**

| SNP                                             | Nearest Gene  | EA | OA | EAf   | Beta   | SE    | P value | N      |
|-------------------------------------------------|---------------|----|----|-------|--------|-------|---------|--------|
| <i>Leptin / Additive / All ancestries</i>       |               |    |    |       |        |       |         |        |
| rs1121980                                       | <i>FTO</i>    | A  | G  | 0.424 | 0.050  | 0.006 | 9.4E-16 | 56,802 |
| rs2340550                                       | <i>ACTL9</i>  | G  | A  | 0.696 | -0.005 | 0.007 | 4.6E-01 | 54,433 |
| rs13389219                                      | <i>COBLL1</i> | T  | C  | 0.410 | 0.048  | 0.007 | 1.0E-12 | 50,386 |
| rs1260326                                       | <i>GCKR</i>   | C  | T  | 0.624 | 0.035  | 0.006 | 4.9E-08 | 56,802 |
| rs900399                                        | <i>CCNL1</i>  | G  | A  | 0.389 | -0.036 | 0.007 | 2.5E-08 | 50,386 |
| rs3799260                                       | <i>KLHL31</i> | T  | C  | 0.822 | -0.023 | 0.008 | 3.7E-03 | 56,802 |
| rs62621812                                      | <i>ZNF800</i> | A  | G  | 0.028 | -0.097 | 0.018 | 8.0E-08 | 56,802 |
| rs791600                                        | <i>LEP</i>    | A  | G  | 0.422 | -0.048 | 0.007 | 2.7E-13 | 49,371 |
| rs17151919                                      | <i>LEP</i>    | A  | G  | 0.007 | -0.259 | 0.040 | 1.3E-10 | 49,111 |
| rs972283                                        | <i>KLF14</i>  | G  | A  | 0.551 | -0.038 | 0.006 | 6.0E-10 | 56,802 |
| <i>Leptin / Additive / European</i>             |               |    |    |       |        |       |         |        |
| rs1121980                                       | <i>FTO</i>    | A  | G  | 0.432 | 0.055  | 0.007 | 7.7E-17 | 49,909 |
| rs2340550                                       | <i>ACTL9</i>  | G  | A  | 0.685 | -0.008 | 0.007 | 2.8E-01 | 48,008 |
| rs13389219                                      | <i>COBLL1</i> | T  | C  | 0.394 | 0.046  | 0.007 | 7.3E-11 | 43,493 |
| rs1260326                                       | <i>GCKR</i>   | C  | T  | 0.607 | 0.032  | 0.007 | 1.7E-06 | 49,909 |
| rs900399                                        | <i>CCNL1</i>  | G  | A  | 0.396 | -0.033 | 0.007 | 2.4E-06 | 43,493 |
| rs3799260                                       | <i>KLHL31</i> | T  | C  | 0.818 | -0.024 | 0.008 | 3.8E-03 | 49,909 |
| rs62621812                                      | <i>ZNF800</i> | A  | G  | 0.031 | -0.098 | 0.018 | 8.2E-08 | 49,909 |
| rs791600                                        | <i>LEP</i>    | A  | G  | 0.411 | -0.043 | 0.007 | 1.4E-09 | 42,478 |
| rs17151919                                      | <i>LEP</i>    | A  | G  | 0.000 | 0.134  | 0.261 | 6.1E-01 | 44,474 |
| rs972283                                        | <i>KLF14</i>  | G  | A  | 0.521 | -0.041 | 0.006 | 1.1E-10 | 49,909 |
| <i>Leptin / Additive / All ancestries / Men</i> |               |    |    |       |        |       |         |        |
| rs1121980                                       | <i>FTO</i>    | A  | G  | 0.433 | 0.075  | 0.009 | 9.7E-16 | 23,861 |
| rs2340550                                       | <i>ACTL9</i>  | G  | A  | 0.693 | -0.027 | 0.010 | 7.5E-03 | 23,861 |
| rs13389219                                      | <i>COBLL1</i> | T  | C  | 0.417 | 0.059  | 0.010 | 9.6E-09 | 20,822 |
| rs1260326                                       | <i>GCKR</i>   | C  | T  | 0.625 | 0.028  | 0.010 | 4.1E-03 | 23,861 |
| rs900399                                        | <i>CCNL1</i>  | G  | A  | 0.387 | -0.030 | 0.010 | 2.8E-03 | 20,822 |
| rs3799260                                       | <i>KLHL31</i> | T  | C  | 0.819 | -0.007 | 0.012 | 5.7E-01 | 23,861 |
| rs62621812                                      | <i>ZNF800</i> | A  | G  | 0.029 | -0.100 | 0.027 | 2.6E-04 | 23,861 |
| rs791600                                        | <i>LEP</i>    | A  | G  | 0.406 | -0.035 | 0.010 | 4.4E-04 | 20,822 |

|                                            |        |   |   |       |        |       |         |        |
|--------------------------------------------|--------|---|---|-------|--------|-------|---------|--------|
| rs17151919                                 | LEP    | A | G | 0.006 | -0.310 | 0.066 | 3.1E-06 | 22,153 |
| rs972283                                   | KLF14  | G | A | 0.544 | -0.036 | 0.009 | 1.3E-04 | 23,861 |
| Leptin / Additive / European / Men         |        |   |   |       |        |       |         |        |
| rs1121980                                  | FTO    | A | G | 0.433 | 0.077  | 0.010 | 1.8E-15 | 21,921 |
| rs2340550                                  | ACTL9  | G | A | 0.684 | -0.029 | 0.010 | 5.9E-03 | 21,921 |
| rs13389219                                 | COBLL1 | T | C | 0.395 | 0.057  | 0.011 | 7.0E-08 | 18,882 |
| rs1260326                                  | GCKR   | C | T | 0.608 | 0.026  | 0.010 | 8.4E-03 | 21,921 |
| rs900399                                   | CCNL1  | G | A | 0.395 | -0.026 | 0.011 | 1.5E-02 | 18,882 |
| rs3799260                                  | KLHL31 | T | C | 0.819 | -0.007 | 0.012 | 5.6E-01 | 21,921 |
| rs62621812                                 | ZNF800 | A | G | 0.031 | -0.100 | 0.027 | 2.7E-04 | 21,921 |
| rs791600                                   | LEP    | A | G | 0.410 | -0.032 | 0.010 | 2.0E-03 | 18,882 |
| rs17151919                                 | LEP    | A | G | 0.000 | 0.155  | 0.349 | 6.6E-01 | 20,213 |
| rs972283                                   | KLF14  | G | A | 0.522 | -0.037 | 0.010 | 1.1E-04 | 21,921 |
| Leptin / Additive / All ancestries / Women |        |   |   |       |        |       |         |        |
| rs1121980                                  | FTO    | A | G | 0.417 | 0.035  | 0.008 | 1.5E-05 | 32,940 |
| rs2340550                                  | ACTL9  | G | A | 0.697 | 0.010  | 0.009 | 2.5E-01 | 30,571 |
| rs13389219                                 | COBLL1 | T | C | 0.405 | 0.040  | 0.009 | 5.6E-06 | 29,563 |
| rs1260326                                  | GCKR   | C | T | 0.624 | 0.043  | 0.008 | 2.1E-07 | 32,940 |
| rs900399                                   | CCNL1  | G | A | 0.391 | -0.049 | 0.008 | 6.2E-09 | 29,563 |
| rs3799260                                  | KLHL31 | T | C | 0.825 | -0.041 | 0.010 | 5.6E-05 | 32,940 |
| rs62621812                                 | ZNF800 | A | G | 0.027 | -0.102 | 0.024 | 2.2E-05 | 32,940 |
| rs791600                                   | LEP    | A | G | 0.434 | -0.060 | 0.009 | 2.9E-12 | 28,548 |
| rs17151919                                 | LEP    | A | G | 0.007 | -0.233 | 0.049 | 1.8E-06 | 26,957 |
| rs972283                                   | KLF14  | G | A | 0.555 | -0.043 | 0.008 | 6.5E-08 | 32,940 |
| Leptin / Additive / European / Women       |        |   |   |       |        |       |         |        |
| rs1121980                                  | FTO    | A | G | 0.431 | 0.044  | 0.009 | 6.2E-07 | 27,987 |
| rs2340550                                  | ACTL9  | G | A | 0.685 | 0.007  | 0.010 | 4.6E-01 | 26,086 |
| rs13389219                                 | COBLL1 | T | C | 0.392 | 0.038  | 0.009 | 6.1E-05 | 24,610 |
| rs1260326                                  | GCKR   | C | T | 0.606 | 0.040  | 0.009 | 6.0E-06 | 27,987 |
| rs900399                                   | CCNL1  | G | A | 0.397 | -0.048 | 0.009 | 2.5E-07 | 24,610 |
| rs3799260                                  | KLHL31 | T | C | 0.818 | -0.043 | 0.011 | 8.9E-05 | 27,987 |
| rs62621812                                 | ZNF800 | A | G | 0.032 | -0.103 | 0.024 | 2.1E-05 | 27,987 |
| rs791600                                   | LEP    | A | G | 0.413 | -0.054 | 0.009 | 8.3E-09 | 23,595 |
| rs17151919                                 | LEP    | A | G | 0.000 | -0.039 | 0.380 | 9.2E-01 | 24,260 |

|                                                  |        |   |   |       |        |       |         |        |
|--------------------------------------------------|--------|---|---|-------|--------|-------|---------|--------|
| rs972283                                         | KLF14  | G | A | 0.521 | -0.048 | 0.009 | 1.6E-08 | 27,987 |
| <i>Leptin / Recessive / All ancestries</i>       |        |   |   |       |        |       |         |        |
| rs1121980                                        | FTO    | A | G | 0.424 | 0.071  | 0.011 | 1.1E-10 | 56,802 |
| rs2340550                                        | ACTL9  | G | A | 0.696 | -0.006 | 0.009 | 4.6E-01 | 54,433 |
| rs13389219                                       | COBLL1 | T | C | 0.410 | 0.062  | 0.012 | 3.2E-07 | 50,386 |
| rs1260326                                        | GCKR   | C | T | 0.624 | 0.046  | 0.009 | 2.3E-07 | 56,802 |
| rs900399                                         | CCNL1  | G | A | 0.389 | -0.042 | 0.012 | 6.4E-04 | 50,386 |
| rs3799260                                        | KLHL31 | T | C | 0.822 | -0.029 | 0.009 | 1.5E-03 | 56,802 |
| rs62621812                                       | ZNF800 | A | G | 0.021 | -0.037 | 0.124 | 7.7E-01 | 56,802 |
| rs791600                                         | LEP    | A | G | 0.422 | -0.074 | 0.012 | 6.9E-10 | 49,371 |
| rs17151919                                       | LEP    | A | G | 0.007 | -0.527 | 0.190 | 5.6E-03 | 49,111 |
| rs972283                                         | KLF14  | G | A | 0.551 | -0.049 | 0.009 | 2.5E-07 | 56,802 |
| <i>Leptin / Recessive / European</i>             |        |   |   |       |        |       |         |        |
| rs1121980                                        | FTO    | A | G | 0.432 | 0.078  | 0.012 | 3.2E-11 | 49,909 |
| rs2340550                                        | ACTL9  | G | A | 0.685 | -0.011 | 0.009 | 2.5E-01 | 48,008 |
| rs13389219                                       | COBLL1 | T | C | 0.394 | 0.061  | 0.013 | 4.5E-06 | 43,493 |
| rs1260326                                        | GCKR   | C | T | 0.607 | 0.041  | 0.009 | 1.2E-05 | 49,909 |
| rs900399                                         | CCNL1  | G | A | 0.396 | -0.036 | 0.013 | 6.6E-03 | 43,493 |
| rs3799260                                        | KLHL31 | T | C | 0.818 | -0.031 | 0.010 | 1.3E-03 | 49,909 |
| rs62621812                                       | ZNF800 | A | G | 0.023 | -0.037 | 0.124 | 7.7E-01 | 49,909 |
| rs791600                                         | LEP    | A | G | 0.411 | -0.070 | 0.013 | 5.8E-08 | 42,478 |
| rs17151919                                       | LEP    | A | G | 0.000 | NA     | NA    | NA      | 44,474 |
| rs972283                                         | KLF14  | G | A | 0.521 | -0.054 | 0.010 | 9.5E-08 | 49,909 |
| <i>Leptin / Recessive / All ancestries / Men</i> |        |   |   |       |        |       |         |        |
| rs1121980                                        | FTO    | A | G | 0.433 | 0.096  | 0.017 | 8.5E-09 | 23,861 |
| rs2340550                                        | ACTL9  | G | A | 0.693 | -0.031 | 0.013 | 1.7E-02 | 23,861 |
| rs13389219                                       | COBLL1 | T | C | 0.417 | 0.085  | 0.019 | 7.0E-06 | 20,822 |
| rs1260326                                        | GCKR   | C | T | 0.625 | 0.031  | 0.014 | 2.4E-02 | 23,861 |
| rs900399                                         | CCNL1  | G | A | 0.387 | -0.029 | 0.019 | 1.3E-01 | 20,822 |
| rs3799260                                        | KLHL31 | T | C | 0.819 | -0.014 | 0.014 | 3.3E-01 | 23,861 |
| rs62621812                                       | ZNF800 | A | G | 0.021 | -0.067 | 0.192 | 7.3E-01 | 23,861 |
| rs791600                                         | LEP    | A | G | 0.406 | -0.065 | 0.019 | 4.6E-04 | 20,822 |
| rs17151919                                       | LEP    | A | G | 0.005 | -0.725 | 0.260 | 5.3E-03 | 22,153 |
| rs972283                                         | KLF14  | G | A | 0.544 | -0.050 | 0.015 | 6.0E-04 | 23,861 |

|                                                    |               |   |   |       |        |       |         |        |
|----------------------------------------------------|---------------|---|---|-------|--------|-------|---------|--------|
| <i>Leptin / Recessive / European / Men</i>         |               |   |   |       |        |       |         |        |
| rs1121980                                          | <i>FTO</i>    | A | G | 0.433 | 0.100  | 0.017 | 7.6E-09 | 21,921 |
| rs2340550                                          | <i>ACTL9</i>  | G | A | 0.684 | -0.035 | 0.014 | 1.1E-02 | 21,921 |
| rs13389219                                         | <i>COBLL1</i> | T | C | 0.395 | 0.080  | 0.020 | 7.1E-05 | 18,882 |
| rs1260326                                          | <i>GCKR</i>   | C | T | 0.608 | 0.027  | 0.014 | 6.0E-02 | 21,921 |
| rs900399                                           | <i>CCNL1</i>  | G | A | 0.395 | -0.023 | 0.020 | 2.6E-01 | 18,882 |
| rs3799260                                          | <i>KLHL31</i> | T | C | 0.819 | -0.015 | 0.014 | 2.9E-01 | 21,921 |
| rs62621812                                         | <i>ZNF800</i> | A | G | 0.023 | -0.067 | 0.192 | 7.3E-01 | 21,921 |
| rs791600                                           | <i>LEP</i>    | A | G | 0.410 | -0.065 | 0.019 | 8.7E-04 | 18,882 |
| rs17151919                                         | <i>LEP</i>    | A | G | 0.000 | NA     | Inf   | NA      | 20,213 |
| rs972283                                           | <i>KLF14</i>  | G | A | 0.522 | -0.052 | 0.015 | 5.6E-04 | 21,921 |
| <i>Leptin / Recessive / All ancestries / Women</i> |               |   |   |       |        |       |         |        |
| rs1121980                                          | <i>FTO</i>    | A | G | 0.417 | 0.058  | 0.015 | 6.8E-05 | 32,940 |
| rs2340550                                          | <i>ACTL9</i>  | G | A | 0.697 | 0.011  | 0.012 | 3.6E-01 | 30,571 |
| rs13389219                                         | <i>COBLL1</i> | T | C | 0.405 | 0.052  | 0.016 | 9.4E-04 | 29,563 |
| rs1260326                                          | <i>GCKR</i>   | C | T | 0.624 | 0.059  | 0.012 | 3.9E-07 | 32,940 |
| rs900399                                           | <i>CCNL1</i>  | G | A | 0.391 | -0.061 | 0.016 | 1.5E-04 | 29,563 |
| rs3799260                                          | <i>KLHL31</i> | T | C | 0.825 | -0.047 | 0.012 | 8.4E-05 | 32,940 |
| rs62621812                                         | <i>ZNF800</i> | A | G | 0.019 | -0.149 | 0.162 | 3.6E-01 | 32,940 |
| rs791600                                           | <i>LEP</i>    | A | G | 0.434 | -0.088 | 0.016 | 1.9E-08 | 28,548 |
| rs17151919                                         | <i>LEP</i>    | A | G | 0.007 | -0.195 | 0.280 | 4.9E-01 | 26,957 |
| rs972283                                           | <i>KLF14</i>  | G | A | 0.555 | -0.055 | 0.012 | 8.5E-06 | 32,940 |
| <i>Leptin / Recessive / European / Women</i>       |               |   |   |       |        |       |         |        |
| rs1121980                                          | <i>FTO</i>    | A | G | 0.431 | 0.068  | 0.016 | 1.4E-05 | 27,987 |
| rs2340550                                          | <i>ACTL9</i>  | G | A | 0.685 | 0.006  | 0.013 | 6.5E-01 | 26,086 |
| rs13389219                                         | <i>COBLL1</i> | T | C | 0.392 | 0.055  | 0.018 | 2.1E-03 | 24,610 |
| rs1260326                                          | <i>GCKR</i>   | C | T | 0.606 | 0.055  | 0.013 | 1.3E-05 | 27,987 |
| rs900399                                           | <i>CCNL1</i>  | G | A | 0.397 | -0.057 | 0.017 | 9.9E-04 | 24,610 |
| rs3799260                                          | <i>KLHL31</i> | T | C | 0.818 | -0.049 | 0.013 | 1.5E-04 | 27,987 |
| rs62621812                                         | <i>ZNF800</i> | A | G | 0.022 | -0.149 | 0.162 | 3.6E-01 | 27,987 |
| rs791600                                           | <i>LEP</i>    | A | G | 0.413 | -0.083 | 0.017 | 1.8E-06 | 23,595 |
| rs17151919                                         | <i>LEP</i>    | A | G | 0.000 | NA     | NA    | NA      | 24,260 |
| rs972283                                           | <i>KLF14</i>  | G | A | 0.521 | -0.062 | 0.014 | 5.6E-06 | 27,987 |
| <i>LeptinAdjBMI / Additive / All ancestries</i>    |               |   |   |       |        |       |         |        |

|                                                       |        |   |   |       |        |       |         |        |
|-------------------------------------------------------|--------|---|---|-------|--------|-------|---------|--------|
| rs1121980                                             | FTO    | A | G | 0.424 | 0.003  | 0.006 | 5.7E-01 | 56,708 |
| rs2340550                                             | ACTL9  | G | A | 0.695 | -0.014 | 0.007 | 3.2E-02 | 54,339 |
| rs13389219                                            | COBLL1 | T | C | 0.410 | 0.053  | 0.007 | 3.0E-15 | 50,297 |
| rs1260326                                             | GCKR   | C | T | 0.624 | 0.050  | 0.006 | 2.7E-15 | 56,708 |
| rs900399                                              | CCNL1  | G | A | 0.389 | -0.041 | 0.007 | 5.2E-10 | 50,297 |
| rs3799260                                             | KLHL31 | T | C | 0.822 | -0.036 | 0.008 | 4.0E-06 | 56,708 |
| rs62621812                                            | ZNF800 | A | G | 0.028 | -0.127 | 0.018 | 2.0E-12 | 56,708 |
| rs791600                                              | LEP    | A | G | 0.422 | -0.066 | 0.007 | 1.1E-23 | 49,282 |
| rs17151919                                            | LEP    | A | G | 0.007 | -0.333 | 0.040 | 1.5E-16 | 49,034 |
| rs972283                                              | KLF14  | G | A | 0.550 | -0.053 | 0.006 | 6.3E-18 | 56,708 |
| <i>LeptinAdjBMI / Additive / European</i>             |        |   |   |       |        |       |         |        |
| rs1121980                                             | FTO    | A | G | 0.432 | 0.005  | 0.007 | 4.5E-01 | 49,830 |
| rs2340550                                             | ACTL9  | G | A | 0.685 | -0.016 | 0.007 | 2.6E-02 | 47,929 |
| rs13389219                                            | COBLL1 | T | C | 0.394 | 0.053  | 0.007 | 1.1E-13 | 43,419 |
| rs1260326                                             | GCKR   | C | T | 0.607 | 0.048  | 0.007 | 4.3E-13 | 49,830 |
| rs900399                                              | CCNL1  | G | A | 0.396 | -0.040 | 0.007 | 9.2E-09 | 43,419 |
| rs3799260                                             | KLHL31 | T | C | 0.818 | -0.038 | 0.008 | 3.8E-06 | 49,830 |
| rs62621812                                            | ZNF800 | A | G | 0.031 | -0.127 | 0.018 | 2.8E-12 | 49,830 |
| rs791600                                              | LEP    | A | G | 0.411 | -0.063 | 0.007 | 5.4E-19 | 42,404 |
| rs17151919                                            | LEP    | A | G | 0.000 | -0.187 | 0.261 | 4.7E-01 | 44,401 |
| rs972283                                              | KLF14  | G | A | 0.521 | -0.056 | 0.006 | 3.8E-18 | 49,830 |
| <i>LeptinAdjBMI / Additive / All ancestries / Men</i> |        |   |   |       |        |       |         |        |
| rs1121980                                             | FTO    | A | G | 0.433 | 0.028  | 0.009 | 2.6E-03 | 23,822 |
| rs2340550                                             | ACTL9  | G | A | 0.693 | -0.050 | 0.010 | 8.5E-07 | 23,822 |
| rs13389219                                            | COBLL1 | T | C | 0.417 | 0.052  | 0.010 | 3.8E-07 | 20,787 |
| rs1260326                                             | GCKR   | C | T | 0.624 | 0.043  | 0.010 | 8.4E-06 | 23,822 |
| rs900399                                              | CCNL1  | G | A | 0.387 | -0.036 | 0.010 | 4.3E-04 | 20,787 |
| rs3799260                                             | KLHL31 | T | C | 0.819 | -0.023 | 0.012 | 6.0E-02 | 23,822 |
| rs62621812                                            | ZNF800 | A | G | 0.029 | -0.148 | 0.027 | 7.0E-08 | 23,822 |
| rs791600                                              | LEP    | A | G | 0.406 | -0.054 | 0.010 | 6.8E-08 | 20,787 |
| rs17151919                                            | LEP    | A | G | 0.006 | -0.399 | 0.066 | 1.2E-09 | 22,119 |
| rs972283                                              | KLF14  | G | A | 0.544 | -0.045 | 0.009 | 1.8E-06 | 23,822 |
| <i>LeptinAdjBMI / Additive / European / Men</i>       |        |   |   |       |        |       |         |        |
| rs1121980                                             | FTO    | A | G | 0.433 | 0.026  | 0.010 | 6.4E-03 | 21,883 |

|                                                         |        |   |   |       |        |       |         |        |
|---------------------------------------------------------|--------|---|---|-------|--------|-------|---------|--------|
| rs2340550                                               | ACTL9  | G | A | 0.684 | -0.053 | 0.010 | 4.1E-07 | 21,883 |
| rs13389219                                              | COBLL1 | T | C | 0.395 | 0.048  | 0.011 | 5.2E-06 | 18,848 |
| rs1260326                                               | GCKR   | C | T | 0.608 | 0.042  | 0.010 | 2.1E-05 | 21,883 |
| rs900399                                                | CCNL1  | G | A | 0.395 | -0.033 | 0.011 | 2.1E-03 | 18,848 |
| rs3799260                                               | KLHL31 | T | C | 0.819 | -0.025 | 0.012 | 4.3E-02 | 21,883 |
| rs62621812                                              | ZNF800 | A | G | 0.031 | -0.146 | 0.028 | 1.1E-07 | 21,883 |
| rs791600                                                | LEP    | A | G | 0.410 | -0.049 | 0.010 | 2.5E-06 | 18,848 |
| rs17151919                                              | LEP    | A | G | 0.000 | -0.225 | 0.352 | 5.2E-01 | 20,180 |
| rs972283                                                | KLF14  | G | A | 0.522 | -0.048 | 0.010 | 4.8E-07 | 21,883 |
| <i>LeptinAdjBMI / Additive / All ancestries / Women</i> |        |   |   |       |        |       |         |        |
| rs1121980                                               | FTO    | A | G | 0.417 | -0.013 | 0.008 | 1.2E-01 | 32,886 |
| rs2340550                                               | ACTL9  | G | A | 0.697 | 0.007  | 0.009 | 4.2E-01 | 30,517 |
| rs13389219                                              | COBLL1 | T | C | 0.405 | 0.052  | 0.009 | 2.0E-09 | 29,510 |
| rs1260326                                               | GCKR   | C | T | 0.624 | 0.059  | 0.008 | 6.2E-13 | 32,886 |
| rs900399                                                | CCNL1  | G | A | 0.391 | -0.054 | 0.008 | 1.2E-10 | 29,510 |
| rs3799260                                               | KLHL31 | T | C | 0.825 | -0.055 | 0.010 | 1.0E-07 | 32,886 |
| rs62621812                                              | ZNF800 | A | G | 0.027 | -0.125 | 0.024 | 2.2E-07 | 32,886 |
| rs791600                                                | LEP    | A | G | 0.434 | -0.079 | 0.009 | 4.1E-20 | 28,495 |
| rs17151919                                              | LEP    | A | G | 0.007 | -0.291 | 0.050 | 5.7E-09 | 26,915 |
| rs972283                                                | KLF14  | G | A | 0.555 | -0.063 | 0.008 | 3.7E-15 | 32,886 |
| <i>LeptinAdjBMI / Additive / European / Women</i>       |        |   |   |       |        |       |         |        |
| rs1121980                                               | FTO    | A | G | 0.431 | -0.009 | 0.009 | 3.2E-01 | 27,947 |
| rs2340550                                               | ACTL9  | G | A | 0.685 | 0.008  | 0.009 | 4.1E-01 | 26,046 |
| rs13389219                                              | COBLL1 | T | C | 0.392 | 0.055  | 0.009 | 3.8E-09 | 24,571 |
| rs1260326                                               | GCKR   | C | T | 0.606 | 0.057  | 0.009 | 9.4E-11 | 27,947 |
| rs900399                                                | CCNL1  | G | A | 0.398 | -0.058 | 0.009 | 3.4E-10 | 24,571 |
| rs3799260                                               | KLHL31 | T | C | 0.818 | -0.057 | 0.011 | 2.2E-07 | 27,947 |
| rs62621812                                              | ZNF800 | A | G | 0.032 | -0.126 | 0.024 | 1.9E-07 | 27,947 |
| rs791600                                                | LEP    | A | G | 0.413 | -0.080 | 0.009 | 2.9E-17 | 23,556 |
| rs17151919                                              | LEP    | A | G | 0.000 | -0.310 | 0.375 | 4.1E-01 | 24,221 |
| rs972283                                                | KLF14  | G | A | 0.521 | -0.066 | 0.009 | 1.3E-14 | 27,947 |
| <i>LeptinAdjBMI / Recessive / All ancestries</i>        |        |   |   |       |        |       |         |        |
| rs1121980                                               | FTO    | A | G | 0.424 | 0.000  | 0.011 | 9.8E-01 | 56,708 |
| rs2340550                                               | ACTL9  | G | A | 0.695 | -0.014 | 0.009 | 9.8E-02 | 54,339 |

|                                                 |        |   |   |       |        |       |         |        |
|-------------------------------------------------|--------|---|---|-------|--------|-------|---------|--------|
| rs13389219                                      | COBLL1 | T | C | 0.410 | 0.080  | 0.012 | 7.0E-11 | 50,297 |
| rs1260326                                       | GCKR   | C | T | 0.624 | 0.057  | 0.009 | 1.8E-10 | 56,708 |
| rs900399                                        | CCNL1  | G | A | 0.389 | -0.057 | 0.012 | 4.3E-06 | 50,297 |
| rs3799260                                       | KLHL31 | T | C | 0.822 | -0.044 | 0.009 | 1.7E-06 | 56,708 |
| rs62621812                                      | ZNF800 | A | G | 0.021 | -0.145 | 0.124 | 2.4E-01 | 56,708 |
| rs791600                                        | LEP    | A | G | 0.422 | -0.099 | 0.012 | 2.4E-16 | 49,282 |
| rs17151919                                      | LEP    | A | G | 0.007 | -0.795 | 0.190 | 2.9E-05 | 49,034 |
| rs972283                                        | KLF14  | G | A | 0.550 | -0.071 | 0.009 | 6.1E-14 | 56,708 |
| LeptinAdjBMI / Recessive / European             |        |   |   |       |        |       |         |        |
| rs1121980                                       | FTO    | A | G | 0.432 | -0.005 | 0.012 | 6.8E-01 | 49,830 |
| rs2340550                                       | ACTL9  | G | A | 0.685 | -0.018 | 0.009 | 5.7E-02 | 47,929 |
| rs13389219                                      | COBLL1 | T | C | 0.394 | 0.081  | 0.013 | 1.4E-09 | 43,419 |
| rs1260326                                       | GCKR   | C | T | 0.607 | 0.053  | 0.009 | 1.9E-08 | 49,830 |
| rs900399                                        | CCNL1  | G | A | 0.396 | -0.054 | 0.013 | 3.8E-05 | 43,419 |
| rs3799260                                       | KLHL31 | T | C | 0.818 | -0.047 | 0.010 | 1.3E-06 | 49,830 |
| rs62621812                                      | ZNF800 | A | G | 0.023 | -0.145 | 0.124 | 2.4E-01 | 49,830 |
| rs791600                                        | LEP    | A | G | 0.411 | -0.099 | 0.013 | 2.7E-14 | 42,404 |
| rs17151919                                      | LEP    | A | G | 0.000 | NA     | Inf   | NA      | 44,401 |
| rs972283                                        | KLF14  | G | A | 0.521 | -0.079 | 0.010 | 8.0E-15 | 49,830 |
| LeptinAdjBMI / Recessive / All ancestries / Men |        |   |   |       |        |       |         |        |
| rs1121980                                       | FTO    | A | G | 0.433 | 0.024  | 0.017 | 1.6E-01 | 23,822 |
| rs2340550                                       | ACTL9  | G | A | 0.693 | -0.065 | 0.013 | 6.5E-07 | 23,822 |
| rs13389219                                      | COBLL1 | T | C | 0.417 | 0.082  | 0.019 | 1.4E-05 | 20,787 |
| rs1260326                                       | GCKR   | C | T | 0.624 | 0.046  | 0.014 | 7.9E-04 | 23,822 |
| rs900399                                        | CCNL1  | G | A | 0.387 | -0.036 | 0.019 | 6.2E-02 | 20,787 |
| rs3799260                                       | KLHL31 | T | C | 0.819 | -0.030 | 0.014 | 2.9E-02 | 23,822 |
| rs62621812                                      | ZNF800 | A | G | 0.021 | -0.293 | 0.192 | 1.3E-01 | 23,822 |
| rs791600                                        | LEP    | A | G | 0.406 | -0.095 | 0.019 | 4.2E-07 | 20,787 |
| rs17151919                                      | LEP    | A | G | 0.005 | -0.942 | 0.258 | 2.5E-04 | 22,119 |
| rs972283                                        | KLF14  | G | A | 0.544 | -0.058 | 0.015 | 6.2E-05 | 23,822 |
| LeptinAdjBMI / Recessive / European / Men       |        |   |   |       |        |       |         |        |
| rs1121980                                       | FTO    | A | G | 0.433 | 0.021  | 0.017 | 2.2E-01 | 21,883 |
| rs2340550                                       | ACTL9  | G | A | 0.684 | -0.071 | 0.014 | 2.0E-07 | 21,883 |
| rs13389219                                      | COBLL1 | T | C | 0.395 | 0.072  | 0.020 | 3.3E-04 | 18,848 |

|                                                          |        |   |   |       |        |       |         |        |
|----------------------------------------------------------|--------|---|---|-------|--------|-------|---------|--------|
| rs1260326                                                | GCKR   | C | T | 0.608 | 0.045  | 0.014 | 1.6E-03 | 21,883 |
| rs900399                                                 | CCNL1  | G | A | 0.395 | -0.032 | 0.020 | 1.1E-01 | 18,848 |
| rs3799260                                                | KLHL31 | T | C | 0.819 | -0.034 | 0.015 | 2.0E-02 | 21,883 |
| rs62621812                                               | ZNF800 | A | G | 0.023 | -0.293 | 0.192 | 1.3E-01 | 21,883 |
| rs791600                                                 | LEP    | A | G | 0.410 | -0.092 | 0.019 | 2.1E-06 | 18,848 |
| rs17151919                                               | LEP    | A | G | 0.000 | NA     | NA    | NA      | 20,180 |
| rs972283                                                 | KLF14  | G | A | 0.522 | -0.065 | 0.015 | 2.0E-05 | 21,883 |
| <i>LeptinAdjBMI / Recessive / All ancestries / Women</i> |        |   |   |       |        |       |         |        |
| rs1121980                                                | FTO    | A | G | 0.417 | -0.016 | 0.015 | 2.6E-01 | 32,886 |
| rs2340550                                                | ACTL9  | G | A | 0.697 | 0.016  | 0.012 | 1.8E-01 | 30,517 |
| rs13389219                                               | COBLL1 | T | C | 0.405 | 0.080  | 0.016 | 4.3E-07 | 29,510 |
| rs1260326                                                | GCKR   | C | T | 0.624 | 0.068  | 0.012 | 4.4E-09 | 32,886 |
| rs900399                                                 | CCNL1  | G | A | 0.391 | -0.083 | 0.016 | 2.3E-07 | 29,510 |
| rs3799260                                                | KLHL31 | T | C | 0.825 | -0.063 | 0.012 | 1.3E-07 | 32,886 |
| rs62621812                                               | ZNF800 | A | G | 0.019 | -0.241 | 0.162 | 1.4E-01 | 32,886 |
| rs791600                                                 | LEP    | A | G | 0.434 | -0.112 | 0.016 | 5.7E-13 | 28,495 |
| rs17151919                                               | LEP    | A | G | 0.007 | -0.570 | 0.284 | 4.5E-02 | 26,915 |
| rs972283                                                 | KLF14  | G | A | 0.555 | -0.086 | 0.012 | 2.5E-12 | 32,886 |
| <i>LeptinAdjBMI / Recessive / All ancestries / Women</i> |        |   |   |       |        |       |         |        |
| rs1121980                                                | FTO    | A | G | 0.431 | -0.022 | 0.015 | 1.5E-01 | 27,947 |
| rs2340550                                                | ACTL9  | G | A | 0.685 | 0.015  | 0.012 | 2.3E-01 | 26,046 |
| rs13389219                                               | COBLL1 | T | C | 0.392 | 0.093  | 0.018 | 1.7E-07 | 24,571 |
| rs1260326                                                | GCKR   | C | T | 0.606 | 0.062  | 0.013 | 7.0E-07 | 27,947 |
| rs900399                                                 | CCNL1  | G | A | 0.398 | -0.085 | 0.017 | 9.2E-07 | 24,571 |
| rs3799260                                                | KLHL31 | T | C | 0.818 | -0.066 | 0.013 | 2.2E-07 | 27,947 |
| rs62621812                                               | ZNF800 | A | G | 0.022 | -0.241 | 0.162 | 1.4E-01 | 27,947 |
| rs791600                                                 | LEP    | A | G | 0.413 | -0.118 | 0.017 | 1.4E-11 | 23,556 |
| rs17151919                                               | LEP    | A | G | 0.000 | NA     | NA    | NA      | 24,221 |
| rs972283                                                 | KLF14  | G | A | 0.521 | -0.096 | 0.014 | 1.4E-12 | 27,947 |

**Table S5. Comparison of BMI-adjusted and BMI-unadjusted results for leptin associated loci**

| SNP                               | Chr | Position  | Gene          | Meta-analysis                     | Annotation | EA | OA | Beta<br>AdjBMI | Beta  | SE<br>AdjBMI | SE    | P<br>AdjBMI | P       | N<br>AdjBMI | N      |
|-----------------------------------|-----|-----------|---------------|-----------------------------------|------------|----|----|----------------|-------|--------------|-------|-------------|---------|-------------|--------|
| <b>Novel loci</b>                 |     |           |               |                                   |            |    |    |                |       |              |       |             |         |             |        |
| rs3799260                         | 6   | 53519605  | <i>KLHL31</i> | Additive / All ancestries / Women | missense   | C  | T  | 0.055          | 0.041 | 0.010        | 0.010 | 1.0E-07     | 5.6E-05 | 32,886      | 32,940 |
| rs62621812                        | 7   | 127015083 | <i>ZNF800</i> | Additive / All ancestries         | missense   | G  | A  | 0.127          | 0.097 | 0.018        | 0.018 | 2.0E-12     | 8.0E-08 | 56,708      | 56,802 |
| rs17151919                        | 7   | 127894592 | <i>LEP</i>    | Additive / All ancestries         | missense   | G  | A  | 0.333          | 0.259 | 0.040        | 0.040 | 1.5E-16     | 1.1E-10 | 49,034      | 49,111 |
| rs972283                          | 7   | 130466854 | <i>KLF14</i>  | Additive / European               | intergenic | A  | G  | 0.056          | 0.041 | 0.006        | 0.006 | 3.8E-18     | 1.1E-10 | 49,830      | 49,909 |
| rs2340550                         | 19  | 8808942   | <i>ACTL9</i>  | Recessive / European / Men        | missense   | A  | G  | 0.071          | 0.035 | 0.014        | 0.014 | 2.0E-07     | 1.1E-02 | 21,883      | 21,921 |
| <b>Previously identified loci</b> |     |           |               |                                   |            |    |    |                |       |              |       |             |         |             |        |
| rs1260326                         | 2   | 27730940  | <i>GCKR</i>   | Additive / All ancestries         | missense   | C  | T  | 0.050          | 0.035 | 0.006        | 0.006 | 2.7E-15     | 4.9E-08 | 56,708      | 56,802 |
| rs13389219                        | 2   | 165528876 | <i>COBLL1</i> | Additive / All ancestries         | intronic   | T  | C  | 0.053          | 0.048 | 0.007        | 0.007 | 3.0E-15     | 1.0E-12 | 50,297      | 50,386 |
| rs900399                          | 3   | 156798732 | <i>CCNL1</i>  | Additive / All ancestries / Women | intergenic | A  | G  | 0.054          | 0.049 | 0.008        | 0.008 | 1.2E-10     | 6.2E-09 | 29,510      | 29,563 |
| rs791600                          | 7   | 127865816 | <i>LEP</i>    | Additive / All ancestries         | intergenic | G  | A  | 0.066          | 0.048 | 0.007        | 0.007 | 1.1E-23     | 2.7E-13 | 49,282      | 49,371 |
| rs1121980                         | 16  | 53809247  | <i>FTO</i>    | Additive / European               | intronic   | A  | G  | 0.005          | 0.055 | 0.007        | 0.007 | 4.5E-01     | 7.7E-17 | 49,830      | 49,909 |

The chromosomal positions are based on hg19.

Chr, chromosome; EA, Effect allele; OA, Other allele; EAF, Effect allele frequency; LeptinAdjBMI, leptin adjusted for body mass index

**Table S6. Examination of collider bias with BMI among the exome-array significant loci associated with leptin adjusted for BMI**

| Locus          | MarkerName | EA | EAF         | xL           | pL       | xLadjB      | pLadjB   | xLadjBa  | xB       | pB        |
|----------------|------------|----|-------------|--------------|----------|-------------|----------|----------|----------|-----------|
| <i>FTO</i>     | rs1121980  | A  | 0.4316428   | 0.05486291   | 7.71E-17 | 0.004952214 | 4.47E-01 | 0.04153  | 0.07481  | 6.70E-225 |
| <i>ACTL9*</i>  | rs2340550  | G  | 0.6846579   | -0.007649348 | 2.79E-01 | -0.01562951 | 2.62E-02 | -0.01394 | 0.00345  | 1.51E-01  |
| <i>COBLL1</i>  | rs13389219 | T  | 0.3938886   | 0.04618875   | 7.30E-11 | 0.05254237  | 1.13E-13 | 0.05871  | 0.01261  | 8.16E-08  |
| <i>GCKR</i>    | rs1260326  | C  | 0.6070448   | 0.03182518   | 1.71E-06 | 0.04773787  | 4.32E-13 | 0.04993  | 0.00449  | 5.24E-02  |
| <i>CCNL1</i>   | rs900399   | G  | 0.3961604   | -0.03304733  | 2.43E-06 | -0.04024503 | 9.25E-09 | -0.04198 | -0.00355 | 1.24E-01  |
| <i>KLHL31*</i> | rs3799260  | T  | 0.8183081   | -0.02397769  | 3.79E-03 | -0.03820487 | 3.83E-06 | -0.03499 | 0.00657  | 1.71E-02  |
| <i>ZNF800</i>  | rs62621812 | A  | 0.03142557  | -0.09769461  | 8.18E-08 | -0.1273454  | 2.80E-12 | -0.11685 | 0.02147  | 1.24E-03  |
| <i>LEP</i>     | rs791600   | A  | 0.4110841   | -0.04264698  | 1.36E-09 | -0.06262022 | 5.35E-19 | -0.06034 | 0.00466  | 4.54E-02  |
| <i>LEP*</i>    | rs17151919 | A  | 0.000166917 | 0.1342779    | 6.07E-01 | -0.1868478  | 4.73E-01 | -0.18299 | 0.00789  | 9.20E-01  |
| <i>KLF14</i>   | rs972283   | G  | 0.5211696   | -0.04137304  | 1.12E-10 | -0.05554037 | 3.84E-18 | -0.05942 | -0.00793 | 2.68E-04  |

xL, Effect size for leptin

pL, P value for leptin

xLadjB, Effect size for leptin adjusted for BMI

pLadjB, P value for leptin adjusted for BMI

xLadjBa, Corrected effect size for leptin adjusted for BMI

xB, Effect size for BMI

pB, P value for BMI

\* The *ACTL9*, *KLHL31*, and *LEP* rs17151919 loci reached array-wide significance ( $P < 2 \times 10^{-7}$ ) in meta-analyses of European-ancestry men (recessive model), all-ancestry women, and African-ancestry men and women combined, respectively. The results shown are from meta-analyses of European ancestry individuals only.

**Table S7. Ancestry-specific results for the Val94Met (rs17151919) missense variant in *LEP***

| Ancestry   | Trait        | Chr:Position | EA        | OA        | N     | EAF    | N <sub>GG</sub> | N <sub>GA+AG</sub> | N <sub>AA</sub> | beta   | se    | Pvalue   | I2  |
|------------|--------------|--------------|-----------|-----------|-------|--------|-----------------|--------------------|-----------------|--------|-------|----------|-----|
| All        | LeptinAdjBMI | 7:127894592  | A (Met94) | G (Val94) | 49034 | 0.0067 | 40075           | 609                | 28              | -0.333 | 0.040 | 1.53E-16 | 76% |
| European   | LeptinAdjBMI | 7:127894592  | A (Met94) | G (Val94) | 44401 | 0.0002 | 36065           | 15                 | 0               | -0.187 | 0.261 | 4.73E-01 | 0%  |
| African    | LeptinAdjBMI | 7:127894592  | A (Met94) | G (Val94) | 3901  | 0.0800 | 3302            | 571                | 27              | -0.343 | 0.042 | 2.40E-16 | 94% |
| Hispanic   | LeptinAdjBMI | 7:127894592  | A (Met94) | G (Val94) | 488   | 0.0221 | 464             | 23                 | 1               | -0.209 | NA    | 2.85E-01 | NA  |
| East Asian | LeptinAdjBMI | 7:127894592  | A (Met94) | G (Val94) | 244   | NA     | NA              | NA                 | NA              | NA     | NA    | NA       | NA  |

EA, effect allele; OA, other allele; EAF, effect allele frequency

**Table S8. Gene-based results in all statistical models for leptin-associated genes**

| Gene                                            | Method      | N      | P value | beta   | se    | N variants |
|-------------------------------------------------|-------------|--------|---------|--------|-------|------------|
| <i>Leptin / Additive / All ancestries</i>       |             |        |         |        |       |            |
| <i>CNTD1</i>                                    | SKAT broad  | 49,597 | 9.1E-04 | 0.350  | 0.094 | 6          |
| <i>CNTD1</i>                                    | SKAT strict | 48,582 | 7.0E-02 | 1.043  | 0.330 | 1          |
| <i>CNTD1</i>                                    | VT broad    | 49,597 | 3.9E-06 | 0.746  | 0.149 | 4          |
| <i>CNTD1</i>                                    | VT strict   | 48,582 | 7.0E-02 | 1.043  | 0.330 | 1          |
| <i>DNAJC18</i>                                  | SKAT broad  | 56,013 | 2.2E-02 | 0.062  | 0.057 | 7          |
| <i>DNAJC18</i>                                  | SKAT strict | 49,597 | 5.1E-05 | 0.466  | 0.135 | 2          |
| <i>DNAJC18</i>                                  | VT broad    | 56,013 | 4.3E-03 | 0.323  | 0.096 | 5          |
| <i>DNAJC18</i>                                  | VT strict   | 49,597 | 1.1E-03 | 0.466  | 0.135 | 2          |
| <i>Leptin / Additive / European</i>             |             |        |         |        |       |            |
| <i>CNTD1</i>                                    | SKAT broad  | 42,704 | 1.4E-05 | 0.580  | 0.126 | 5          |
| <i>CNTD1</i>                                    | SKAT strict | NA     | NA      | NA     | NA    | NA         |
| <i>CNTD1</i>                                    | VT broad    | 42,704 | 1.1E-05 | 0.720  | 0.153 | 4          |
| <i>CNTD1</i>                                    | VT strict   | NA     | NA      | NA     | NA    | NA         |
| <i>DNAJC18</i>                                  | SKAT broad  | 49,120 | 3.1E-02 | 0.045  | 0.060 | 7          |
| <i>DNAJC18</i>                                  | SKAT strict | 42,704 | 5.3E-05 | 0.478  | 0.140 | 2          |
| <i>DNAJC18</i>                                  | VT broad    | 49,120 | 8.4E-03 | 0.360  | 0.112 | 5          |
| <i>DNAJC18</i>                                  | VT strict   | 42,704 | 1.3E-03 | 0.478  | 0.140 | 2          |
| <i>Leptin / Additive / All ancestries / Men</i> |             |        |         |        |       |            |
| <i>CNTD1</i>                                    | SKAT broad  | 20,822 | 2.0E-05 | 0.580  | 0.137 | 5          |
| <i>CNTD1</i>                                    | SKAT strict | NA     | NA      | NA     | NA    | NA         |
| <i>CNTD1</i>                                    | VT broad    | 20,822 | 6.4E-06 | 1.026  | 0.209 | 3          |
| <i>CNTD1</i>                                    | VT strict   | NA     | NA      | NA     | NA    | NA         |
| <i>DNAJC18</i>                                  | SKAT broad  | 23,861 | 5.3E-01 | -0.061 | 0.086 | 6          |
| <i>DNAJC18</i>                                  | SKAT strict | 20,822 | 2.0E-01 | 0.034  | 0.223 | 2          |
| <i>DNAJC18</i>                                  | VT broad    | 23,861 | 3.4E-01 | -0.569 | 0.360 | 2          |
| <i>DNAJC18</i>                                  | VT strict   | 20,822 | 1.3E-01 | -0.896 | 0.499 | 1          |
| <i>Leptin / Additive / European / Men</i>       |             |        |         |        |       |            |
| <i>CNTD1</i>                                    | SKAT broad  | 18,882 | 1.3E-07 | 0.898  | 0.165 | 5          |
| <i>CNTD1</i>                                    | SKAT strict | NA     | NA      | NA     | NA    | NA         |
| <i>CNTD1</i>                                    | VT broad    | 18,882 | 1.4E-07 | 0.898  | 0.165 | 5          |
| <i>CNTD1</i>                                    | VT strict   | NA     | NA      | NA     | NA    | NA         |

|                                                   |             |        |         |        |       |    |
|---------------------------------------------------|-------------|--------|---------|--------|-------|----|
| <i>DNAJC18</i>                                    | SKAT broad  | 21,921 | 5.3E-01 | -0.059 | 0.087 | 6  |
| <i>DNAJC18</i>                                    | SKAT strict | 18,882 | 2.0E-01 | 0.034  | 0.223 | 2  |
| <i>DNAJC18</i>                                    | VT broad    | 21,921 | 6.4E-01 | -0.566 | 0.446 | 2  |
| <i>DNAJC18</i>                                    | VT strict   | 18,882 | 1.3E-01 | -0.896 | 0.499 | 1  |
| <i>Leptin / Additive / All ancestries / Women</i> |             |        |         |        |       |    |
| <i>CNTD1</i>                                      | SKAT broad  | 29,563 | 5.5E-01 | 0.178  | 0.123 | 6  |
| <i>CNTD1</i>                                      | SKAT strict | 28,548 | 7.3E-02 | 0.981  | 0.297 | 1  |
| <i>CNTD1</i>                                      | VT broad    | 29,563 | 3.2E-02 | 0.553  | 0.211 | 4  |
| <i>CNTD1</i>                                      | VT strict   | 28,548 | 7.3E-02 | 0.981  | 0.297 | 1  |
| <i>DNAJC18</i>                                    | SKAT broad  | 32,940 | 1.3E-02 | 0.151  | 0.075 | 7  |
| <i>DNAJC18</i>                                    | SKAT strict | 29,563 | 1.9E-05 | 0.717  | 0.166 | 2  |
| <i>DNAJC18</i>                                    | VT broad    | 32,940 | 5.8E-04 | 0.452  | 0.117 | 5  |
| <i>DNAJC18</i>                                    | VT strict   | 29,563 | 3.3E-05 | 0.717  | 0.166 | 2  |
| <i>Leptin / Additive / European / Women</i>       |             |        |         |        |       |    |
| <i>CNTD1</i>                                      | SKAT broad  | 24,610 | 2.7E-01 | 0.233  | 0.188 | 5  |
| <i>CNTD1</i>                                      | SKAT strict | NA     | NA      | NA     | NA    | NA |
| <i>CNTD1</i>                                      | VT broad    | 24,610 | 1.3E-01 | 0.478  | 0.240 | 4  |
| <i>CNTD1</i>                                      | VT strict   | NA     | NA      | NA     | NA    | NA |
| <i>DNAJC18</i>                                    | SKAT broad  | 27,987 | 1.9E-02 | 0.132  | 0.081 | 6  |
| <i>DNAJC18</i>                                    | SKAT strict | 24,610 | 1.3E-05 | 0.767  | 0.177 | 2  |
| <i>DNAJC18</i>                                    | VT broad    | 27,987 | 8.1E-04 | 0.557  | 0.146 | 4  |
| <i>DNAJC18</i>                                    | VT strict   | 24,610 | 2.8E-05 | 0.767  | 0.177 | 2  |
| <i>LeptinAdjBMI / Additive / All ancestries</i>   |             |        |         |        |       |    |
| <i>CNTD1</i>                                      | SKAT broad  | 49,508 | 4.6E-02 | 0.242  | 0.093 | 6  |
| <i>CNTD1</i>                                      | SKAT strict | 48,493 | 9.1E-02 | 0.969  | 0.330 | 1  |
| <i>CNTD1</i>                                      | VT broad    | 49,508 | 9.0E-04 | 0.560  | 0.149 | 4  |
| <i>CNTD1</i>                                      | VT strict   | 48,493 | 9.1E-02 | 0.969  | 0.330 | 1  |
| <i>DNAJC18</i>                                    | SKAT broad  | 55,919 | 4.3E-03 | 0.083  | 0.057 | 7  |
| <i>DNAJC18</i>                                    | SKAT strict | 49,508 | 1.2E-07 | 0.485  | 0.136 | 2  |
| <i>DNAJC18</i>                                    | VT broad    | 55,919 | 1.8E-02 | 0.279  | 0.096 | 5  |
| <i>DNAJC18</i>                                    | VT strict   | 49,508 | 7.1E-04 | 0.485  | 0.136 | 2  |
| <i>LeptinAdjBMI / Additive / European</i>         |             |        |         |        |       |    |
| <i>CNTD1</i>                                      | SKAT broad  | 42,630 | 3.8E-03 | 0.430  | 0.126 | 5  |
| <i>CNTD1</i>                                      | SKAT strict | NA     | NA      | NA     | NA    | NA |
| <i>CNTD1</i>                                      | VT broad    | 42,630 | 2.0E-03 | 0.525  | 0.153 | 4  |

|                                                         |             |        |         |        |       |    |
|---------------------------------------------------------|-------------|--------|---------|--------|-------|----|
| <i>CNTD1</i>                                            | VT strict   | NA     | NA      | NA     | NA    | NA |
| <i>DNAJC18</i>                                          | SKAT broad  | 49,041 | 8.4E-03 | 0.063  | 0.060 | 7  |
| <i>DNAJC18</i>                                          | SKAT strict | 42,630 | 2.3E-07 | 0.474  | 0.141 | 2  |
| <i>DNAJC18</i>                                          | VT broad    | 49,041 | 6.4E-02 | 0.286  | 0.113 | 5  |
| <i>DNAJC18</i>                                          | VT strict   | 42,630 | 1.6E-03 | 0.474  | 0.141 | 2  |
| <i>LeptinAdjBMI / Additive / All ancestries / Men</i>   |             |        |         |        |       |    |
| <i>CNTD1</i>                                            | SKAT broad  | 20,787 | 7.1E-02 | 0.313  | 0.138 | 5  |
| <i>CNTD1</i>                                            | SKAT strict | NA     | NA      | NA     | NA    | NA |
| <i>CNTD1</i>                                            | VT broad    | 20,787 | 1.5E-02 | 0.606  | 0.210 | 3  |
| <i>CNTD1</i>                                            | VT strict   | NA     | NA      | NA     | NA    | NA |
| <i>DNAJC18</i>                                          | SKAT broad  | 23,822 | 2.6E-01 | -0.124 | 0.086 | 6  |
| <i>DNAJC18</i>                                          | VT broad    | 23,822 | 1.6E-01 | -0.713 | 0.359 | 2  |
| <i>DNAJC18</i>                                          | SKAT strict | 20,787 | 9.6E-02 | 0.036  | 0.223 | 2  |
| <i>DNAJC18</i>                                          | VT strict   | 20,787 | 4.2E-02 | -1.138 | 0.498 | 1  |
| <i>LeptinAdjBMI / Additive / European / Men</i>         |             |        |         |        |       |    |
| <i>CNTD1</i>                                            | SKAT broad  | 18,848 | 7.4E-03 | 0.565  | 0.165 | 5  |
| <i>CNTD1</i>                                            | SKAT strict | NA     | NA      | NA     | NA    | NA |
| <i>CNTD1</i>                                            | VT broad    | 18,848 | 2.6E-03 | 0.565  | 0.165 | 5  |
| <i>CNTD1</i>                                            | VT strict   | NA     | NA      | NA     | NA    | NA |
| <i>DNAJC18</i>                                          | SKAT broad  | 21,883 | 2.6E-01 | -0.109 | 0.087 | 6  |
| <i>DNAJC18</i>                                          | SKAT strict | 18,848 | 9.6E-02 | 0.036  | 0.223 | 2  |
| <i>DNAJC18</i>                                          | VT broad    | 21,883 | 2.5E-01 | -0.838 | 0.446 | 2  |
| <i>DNAJC18</i>                                          | VT strict   | 18,848 | 4.2E-02 | -1.138 | 0.498 | 1  |
| <i>LeptinAdjBMI / Additive / All ancestries / Women</i> |             |        |         |        |       |    |
| <i>CNTD1</i>                                            | SKAT broad  | 29,510 | 3.0E-01 | 0.238  | 0.124 | 6  |
| <i>CNTD1</i>                                            | SKAT strict | 28,495 | 7.7E-02 | 0.972  | 0.305 | 1  |
| <i>CNTD1</i>                                            | VT broad    | 29,510 | 1.3E-02 | 0.620  | 0.212 | 4  |
| <i>CNTD1</i>                                            | VT strict   | 28,495 | 7.7E-02 | 0.972  | 0.305 | 1  |
| <i>DNAJC18</i>                                          | SKAT broad  | 32,886 | 7.6E-04 | 0.234  | 0.075 | 7  |
| <i>DNAJC18</i>                                          | SKAT strict | 29,510 | 5.5E-08 | 0.757  | 0.169 | 2  |
| <i>DNAJC18</i>                                          | VT broad    | 32,886 | 4.4E-04 | 0.460  | 0.118 | 5  |
| <i>DNAJC18</i>                                          | VT strict   | 29,510 | 1.5E-05 | 0.757  | 0.169 | 2  |
| <i>LeptinAdjBMI / Additive / European / Women</i>       |             |        |         |        |       |    |
| <i>CNTD1</i>                                            | SKAT broad  | 24,571 | 1.7E-01 | 0.373  | 0.186 | 5  |
| <i>CNTD1</i>                                            | SKAT strict | NA     | NA      | NA     | NA    | NA |

|                |             |        |         |       |       |    |
|----------------|-------------|--------|---------|-------|-------|----|
| <i>CNTD1</i>   | VT broad    | 24,571 | 6.3E-02 | 0.554 | 0.239 | 4  |
| <i>CNTD1</i>   | VT strict   | NA     | NA      | NA    | NA    | NA |
| <i>DNAJC18</i> | SKAT broad  | 27,947 | 2.4E-03 | 0.207 | 0.081 | 6  |
| <i>DNAJC18</i> | SKAT strict | 24,571 | 7.9E-08 | 0.774 | 0.179 | 2  |
| <i>DNAJC18</i> | VT broad    | 27,947 | 4.1E-03 | 0.496 | 0.147 | 4  |
| <i>DNAJC18</i> | VT strict   | 24,571 | 3.2E-05 | 0.774 | 0.179 | 2  |

---

**Table S9. Association of the leptin-decreasing Met94 allele of *LEP* Val94Met (rs1715919) with BMI z-score in African-ancestry children from the CHOP cohort.**

| Age Bin | N    | Allele freq. | Beta   | SE    | P     |
|---------|------|--------------|--------|-------|-------|
| 2       | 2726 | 0.089        | 0.079  | 0.055 | 0.153 |
| 3       | 2570 | 0.089        | 0.123  | 0.056 | 0.029 |
| 4       | 2572 | 0.093        | 0.160  | 0.054 | 0.003 |
| 5       | 2381 | 0.089        | 0.154  | 0.060 | 0.010 |
| 6       | 2030 | 0.091        | 0.204  | 0.066 | 0.002 |
| 7       | 1769 | 0.092        | 0.143  | 0.070 | 0.041 |
| 8       | 1583 | 0.092        | 0.029  | 0.074 | 0.694 |
| 9       | 1476 | 0.099        | 0.017  | 0.078 | 0.824 |
| 10      | 1446 | 0.095        | 0.017  | 0.080 | 0.832 |
| 11      | 1500 | 0.095        | -0.004 | 0.079 | 0.964 |
| 12      | 1455 | 0.096        | -0.036 | 0.075 | 0.631 |
| 13      | 1460 | 0.101        | -0.007 | 0.075 | 0.928 |
| 14      | 1417 | 0.104        | 0.004  | 0.074 | 0.959 |
| 15      | 1355 | 0.099        | 0.048  | 0.077 | 0.537 |
| 16      | 1287 | 0.093        | -0.006 | 0.081 | 0.937 |
| 17      | 1098 | 0.102        | 0.055  | 0.087 | 0.527 |
| 18      | 451  | 0.085        | -0.009 | 0.135 | 0.946 |

**Table S10. Association of the leptin-decreasing C allele of rs10487505 near *LEP* with BMI z-score in a meta-analysis of African-ancestry and European ancestry children from the CHOP cohort.**

| Age Bin | N    | Allele freq. | Beta   | SE    | <i>P</i> |
|---------|------|--------------|--------|-------|----------|
| 2       | 3681 | 0.462        | 0.033  | 0.026 | 0.203    |
| 3       | 3618 | 0.467        | 0.026  | 0.026 | 0.334    |
| 4       | 3681 | 0.469        | 0.058  | 0.026 | 0.027    |
| 5       | 3557 | 0.471        | -0.002 | 0.027 | 0.929    |
| 6       | 3166 | 0.473        | -0.044 | 0.029 | 0.132    |
| 7       | 2869 | 0.469        | -0.006 | 0.031 | 0.835    |
| 8       | 2711 | 0.465        | -0.021 | 0.032 | 0.504    |
| 9       | 2571 | 0.465        | -0.035 | 0.033 | 0.290    |
| 10      | 2608 | 0.468        | -0.033 | 0.033 | 0.317    |
| 11      | 2705 | 0.462        | -0.028 | 0.032 | 0.380    |
| 12      | 2685 | 0.454        | -0.021 | 0.032 | 0.502    |
| 13      | 2697 | 0.459        | 0.004  | 0.031 | 0.898    |
| 14      | 2679 | 0.454        | -0.027 | 0.032 | 0.389    |
| 15      | 2604 | 0.451        | -0.009 | 0.031 | 0.777    |
| 16      | 2463 | 0.458        | 0.012  | 0.033 | 0.719    |
| 17      | 2130 | 0.465        | -0.004 | 0.036 | 0.917    |
| 18      | 663  | 0.456        | -0.003 | 0.062 | 0.959    |

**Table S11. Predicted change in leptin protein stability upon the Val94Met change (Val73Met in the mature leptin protein) in the amino acid sequence**

| Tool             | Protein (PDB-ID) | WT/MT   | Chain | Overall stability | Predicted $\Delta\Delta G$ |
|------------------|------------------|---------|-------|-------------------|----------------------------|
| CUPSAT           | LEP (1AX8)       | VAL/MET | A     | Decreased         | -0.22                      |
| I-Mutant<br>v2.0 | LEP (1AX8)       | VAL/MET | A     | Decreased         | --                         |
| SDM              | LEP (1AX8)       | VAL/MET | A     | Decreased         | -0.72                      |

Table S12. Colocalization of METSIM subcutaneous adipose tissue eQTLs at GWAS loci for leptin

| SNP        | Chr | Position    | MAF  | Probeset      | Allele 1<br>/ EA | Allele 2 | eQTL gene | GWAS variant association with expression level |              |                     |                  | Lead eSNP association with expression level |                       |                 |              |                     |                  | LD r <sup>2</sup> |
|------------|-----|-------------|------|---------------|------------------|----------|-----------|------------------------------------------------|--------------|---------------------|------------------|---------------------------------------------|-----------------------|-----------------|--------------|---------------------|------------------|-------------------|
|            |     |             |      |               |                  |          |           | Beta<br>initial                                | P<br>initial | Beta<br>conditional | P<br>conditional | Lead eSNP                                   | Allele 1/<br>Allele 2 | Beta<br>initial | P<br>initial | Beta<br>conditional | P<br>conditional |                   |
| rs62621812 | 7   | 127,015,083 | 0.06 | 11736419_a_at | G                | A        | ZNF800    | -0.871                                         | 2.40E-16     | 0.000               | 3.18E-01         | rs62621812                                  | A/G                   | 0.871           | 2.40E-16     | 0.000               | 3.2E-01          | 1.00              |
| rs972283   | 7   | 130,466,854 | 0.45 | 11737563_at   | A                | G        | KLF14     | 0.233                                          | 4.14E-06     | -0.322              | 4.46E-01         | rs6467315                                   | G/C                   | -0.238          | 2.26E-06     | -0.552              | 1.9E-01          | 0.98              |
| rs1260326  | 2   | 27,730,940  | 0.36 | 11729870_x_at | C                | T        | EMILIN1   | -0.230                                         | 9.22E-06     | 0.166               | 5.23E-01         | rs780094                                    | C/T                   | -0.240          | 3.33E-06     | -0.407              | 1.1E-01          | 0.96              |
| rs900399   | 3   | 156,798,732 | 0.32 | 11717399_a_at | A                | G        | TIPARP    | -0.905                                         | 2.99E-72     | -0.213              | 1.57E-01         | rs13322435                                  | G/A                   | 0.922           | 9.57E-77     | 0.715               | 2.0E-06          | 0.91              |

LD r2 calculated using 770 METSIM samples (Finnish males) included in eQTL data

A1 (column E) is the leptin raising allele from the Exome Chip analysis. A1 is also the effect allele for the effect sizes listed in columns H and J. Allele 1 in column O is the effect allele for the effect in columns O/Q.

FDR<1% ( P < 2.37 x 10<sup>-4</sup>)

**Table S13. PASCAL gene set enrichment analysis results for leptin unadjusted for BMI using coding variants only.**

| (A) Leptin not adjusted for BMI, European, additive model, sex-combined analysis. Coding variants included. SUM method used (Bonferroni correction for 1000 gene sets and 2 traits: $P < 2.5E-05$ for both $\chi^2 P$ value and $emp P$ value) |                  |               |                                                        |
|------------------------------------------------------------------------------------------------------------------------------------------------------------------------------------------------------------------------------------------------|------------------|---------------|--------------------------------------------------------|
| Name                                                                                                                                                                                                                                           | $\chi^2 P$ value | $emp P$ value | Annotation                                             |
| GO:2000243                                                                                                                                                                                                                                     | 1.30E-04         | 8.80E-05      | positive regulation of reproductive process            |
| MP:0005501                                                                                                                                                                                                                                     | 3.40E-04         | 0.000284      | abnormal skin physiology                               |
| ENSG00000204713                                                                                                                                                                                                                                | 4.31E-04         | 0.000389      | TRIM27 PPI subnetwork                                  |
| ENSG00000112448                                                                                                                                                                                                                                | 4.31E-04         | 0.000397      | ENSG00000112448 PPI subnetwork                         |
| ENSG00000215641                                                                                                                                                                                                                                | 4.31E-04         | 0.000404      | TRIM27 PPI subnetwork                                  |
| GO:0032769                                                                                                                                                                                                                                     | 4.85E-04         | 0.000335      | negative regulation of monooxygenase activity          |
| MP:0002769                                                                                                                                                                                                                                     | 5.05E-04         | 0.000492      | abnormal vas deferens morphology                       |
| ENSG00000008853                                                                                                                                                                                                                                | 8.38E-04         | 0.000432      | RHOB2 PPI subnetwork                                   |
| ENSG00000081019                                                                                                                                                                                                                                | 9.58E-04         | 0.00058       | RSBN1 PPI subnetwork                                   |
| GO:0072527                                                                                                                                                                                                                                     | 1.37E-03         | 9.70E-04      | pyrimidine-containing compound metabolic process       |
| ENSG00000143344                                                                                                                                                                                                                                | 1.56E-03         | 0.00076       | RGL1 PPI subnetwork                                    |
| (B) Leptin not adjusted for BMI, European, additive model, sex-combined analysis. Coding variants included. MAX method used (Bonferroni correction for 1000 gene sets and 2 traits: $P < 2.5E-05$ for both $\chi^2 P$ value and $emp P$ value) |                  |               |                                                        |
| Name                                                                                                                                                                                                                                           | $\chi^2 P$ value | $emp P$ value | Annotation                                             |
| GO:2000243                                                                                                                                                                                                                                     | 1.53E-05         | 1.59E-05      | positive regulation of reproductive process            |
| ENSG00000143344                                                                                                                                                                                                                                | 4.85E-04         | 1.56E-04      | RGL1 PPI subnetwork                                    |
| ENSG00000215641                                                                                                                                                                                                                                | 1.95E-04         | 1.69E-04      | TRIM27 PPI subnetwork                                  |
| ENSG00000204713                                                                                                                                                                                                                                | 1.95E-04         | 1.94E-04      | TRIM27 PPI subnetwork                                  |
| ENSG00000112448                                                                                                                                                                                                                                | 1.95E-04         | 1.96E-04      | ENSG00000112448 PPI subnetwork                         |
| MP:0002769                                                                                                                                                                                                                                     | 2.23E-04         | 2.33E-04      | abnormal vas deferens morphology                       |
| GO:0032769                                                                                                                                                                                                                                     | 2.57E-04         | 2.93E-04      | negative regulation of monooxygenase activity          |
| ENSG00000074211                                                                                                                                                                                                                                | 3.57E-04         | 4.03E-04      | PPP2R2C PPI subnetwork                                 |
| ENSG00000008853                                                                                                                                                                                                                                | 1.30E-03         | 4.40E-04      | RHOB2 PPI subnetwork                                   |
| ENSG00000169682                                                                                                                                                                                                                                | 6.59E-04         | 5.50E-04      | SPNS1 PPI subnetwork                                   |
| ENSG00000081019                                                                                                                                                                                                                                | 8.20E-04         | 5.60E-04      | RSBN1 PPI subnetwork                                   |
| GO:0004715                                                                                                                                                                                                                                     | 7.77E-04         | 5.70E-04      | non-membrane spanning protein tyrosine kinase activity |
| GO:0010458                                                                                                                                                                                                                                     | 7.32E-04         | 6.00E-04      | exit from mitosis                                      |
| ENSG00000090054                                                                                                                                                                                                                                | 2.10E-03         | 9.00E-04      | SPTLC1 PPI subnetwork                                  |
| ENSG00000113578                                                                                                                                                                                                                                | 6.06E-04         | 9.50E-04      | FGF1 PPI subnetwork                                    |
| MP:0008347                                                                                                                                                                                                                                     | 1.09E-03         | 9.70E-04      | decreased gamma-delta T cell number                    |

**Table S14. PASCAL gene set enrichment analysis for leptin adjusted for BMI using coding variants only.**

| (A) Leptin adjusted for BMI, European, additive model, sex-combined analysis. Coding variants included. SUM method used (Bonferroni correction for 1000 gene sets and 2 traits: $P < 2.5E-05$ for both $\chi^2$ Pvalue and empPvalue) |                 |           |                                                                              |
|---------------------------------------------------------------------------------------------------------------------------------------------------------------------------------------------------------------------------------------|-----------------|-----------|------------------------------------------------------------------------------|
| Name                                                                                                                                                                                                                                  | $\chi^2$ Pvalue | empPvalue | Pathway/Gene-set                                                             |
| ENSG00000175575                                                                                                                                                                                                                       | 3.69E-05        | 7.90E-06  | TRIM39PPI subnetwork                                                         |
| ENSG00000204599                                                                                                                                                                                                                       | 3.69E-05        | 7.90E-06  | PAAF1 PPI subnetwork                                                         |
| ENSG00000206495                                                                                                                                                                                                                       | 3.69E-05        | 8.80E-06  | ENSG00000206419 PPI subnetwork                                               |
| ENSG00000206419                                                                                                                                                                                                                       | 3.69E-05        | 1.03E-05  | ENSG00000105972 PPI subnetwork                                               |
| ENSG00000105972                                                                                                                                                                                                                       | 7.14E-05        | 1.13E-05  | mitochondrial large ribosomal subunit                                        |
| GO:0005762                                                                                                                                                                                                                            | 1.62E-04        | 2.66E-05  | organellar large ribosomal subunit                                           |
| GO:0000315                                                                                                                                                                                                                            | 1.62E-04        | 2.76E-05  | KLF1 PPI subnetwork                                                          |
| ENSG00000105610                                                                                                                                                                                                                       | 1.96E-04        | 2.78E-05  | negative regulation of monooxygenase activity                                |
| GO:0032769                                                                                                                                                                                                                            | 1.58E-04        | 5.20E-05  | BCL10 PPI subnetwork                                                         |
| ENSG00000142867                                                                                                                                                                                                                       | 6.84E-05        | 6.10E-05  | CHD2 PPI subnetwork                                                          |
| ENSG00000173575                                                                                                                                                                                                                       | 1.20E-04        | 6.20E-05  | UBE3B PPI subnetwork                                                         |
| ENSG00000151148                                                                                                                                                                                                                       | 6.91E-05        | 6.70E-05  | abnormal skin physiology                                                     |
| MP:0005501                                                                                                                                                                                                                            | 8.97E-05        | 6.70E-05  | CCDC33 PPI subnetwork                                                        |
| ENSG00000140481                                                                                                                                                                                                                       | 3.61E-04        | 9.70E-05  | abnormal cell migration                                                      |
| ENSG00000198925                                                                                                                                                                                                                       | 1.53E-04        | 2.13E-04  | HSPA12A PPI subnetwork                                                       |
| MP:0003091                                                                                                                                                                                                                            | 2.13E-04        | 1.59E-04  | SV2A PPI subnetwork                                                          |
| ENSG00000159164                                                                                                                                                                                                                       | 5.38E-04        | 1.61E-04  | MTHFD1L PPI subnetwork                                                       |
| ENSG00000120254                                                                                                                                                                                                                       | 4.09E-04        | 1.75E-04  | REACTOME_REGULATION_OF_ACTIVATED_PAK:2P34_BY_PROTEASOME_MEDIATED_DEGRADATION |
| REACTOME_REGULATION_OF_ACTIVATED_PAK:2P34_BY_PROTEASOME_MEDIATED_DEGRADATION                                                                                                                                                          | 3.32E-04        | 1.79E-04  | ATG9A PPI subnetwork                                                         |
| ENSG00000165868                                                                                                                                                                                                                       | 7.61E-04        | 2.16E-04  | ENO2 PPI subnetwork                                                          |
| ENSG00000178363                                                                                                                                                                                                                       | 2.21E-04        | 4.50E-04  | EEF1A2 PPI subnetwork                                                        |
| ENSG00000111674                                                                                                                                                                                                                       | 8.97E-04        | 2.31E-04  | RHOBTB2 PPI subnetwork                                                       |
| ENSG00000008853                                                                                                                                                                                                                       | 6.23E-04        | 2.49E-04  | exit from mitosis                                                            |
| GO:0010458                                                                                                                                                                                                                            | 5.32E-04        | 2.67E-04  | ZNF462 PPI subnetwork                                                        |
| ENSG00000148143                                                                                                                                                                                                                       | 8.18E-04        | 2.78E-04  | TOP2B PPI subnetwork                                                         |
| ENSG00000077097                                                                                                                                                                                                                       | 5.67E-04        | 2.82E-04  | RSBN1 PPI subnetwork                                                         |
| ENSG00000081019                                                                                                                                                                                                                       | 6.96E-04        | 3.13E-04  | HLA-G PPI subnetwork                                                         |
| ENSG00000204632                                                                                                                                                                                                                       | 1.21E-03        | 3.16E-04  | ENSG00000206443 PPI subnetwork                                               |
| ENSG00000206443                                                                                                                                                                                                                       | 1.21E-03        | 3.21E-04  | HLA-G PPI subnetwork                                                         |
| ENSG00000206506                                                                                                                                                                                                                       | 1.21E-03        | 3.22E-04  | acanthosis                                                                   |

|                                                                  |          |          |                                                                  |
|------------------------------------------------------------------|----------|----------|------------------------------------------------------------------|
| MP:0001874                                                       | 3.68E-04 | 3.41E-04 | REACTOME_AUTODEGRADATION_OF_CDH1_BY_CDH1APCC                     |
| REACTOME_AUTODEGRADATION_OF_CDH1_BY_CDH1APCC                     | 5.20E-04 | 3.43E-04 | SBF1 PPI subnetwork                                              |
| ENSG00000100241                                                  | 9.96E-04 | 3.67E-04 | ENSG00000206413 PPI subnetwork                                   |
| ENSG00000206413                                                  | 1.46E-03 | 3.75E-04 | NIPSNAP1 PPI subnetwork                                          |
| ENSG00000184117                                                  | 1.14E-03 | 3.78E-04 | abnormal CD4-positive T cell differentiation                     |
| MP:0008076                                                       | 7.62E-04 | 3.81E-04 | HLA-E PPI subnetwork                                             |
| ENSG00000206493                                                  | 1.46E-03 | 3.85E-04 | REACTOME_P53:INDEPENDENT_G1S_DNA_DAMAGE_CHECKPOINT               |
| REACTOME_P53:INDEPENDENT_G1S_DNA_DAMAGE_CHECKPOINT               | 8.27E-04 | 4.13E-04 | ZNF317 PPI subnetwork                                            |
| ENSG00000130803                                                  | 5.25E-04 | 4.35E-04 | REACTOME_P53:INDEPENDENT_DNA_DAMAGE_RESPONSE                     |
| REACTOME_P53:INDEPENDENT_DNA_DAMAGE_RESPONSE                     | 8.27E-04 | 4.40E-04 | PDE1A PPI subnetwork                                             |
| ENSG00000198838                                                  | 4.45E-04 | 5.70E-04 | TOMM34 PPI subnetwork                                            |
| ENSG00000115252                                                  | 1.34E-03 | 4.46E-04 | FBNP1 PPI subnetwork                                             |
| ENSG00000187239                                                  | 1.01E-03 | 4.47E-04 | CALML3 PPI subnetwork                                            |
| ENSG00000101210                                                  | 5.88E-04 | 4.50E-04 | REACTOME_MYD88_DEPENDENT_CASCADE_INITIATED_ON_ENDOSOME           |
| REACTOME_MYD88_DEPENDENT_CASCADE_INITIATED_ON_ENDOSOME           | 8.42E-04 | 4.55E-04 | REACTOME_UBIQUITIN_MEDIATED_DEGRADATION_OF_PHOSPHORYLATED_CDC25A |
| REACTOME_UBIQUITIN_MEDIATED_DEGRADATION_OF_PHOSPHORYLATED_CDC25A | 8.27E-04 | 4.62E-04 | cellular defense response                                        |
| GO:0006968                                                       | 9.97E-04 | 4.76E-04 | macrolide binding                                                |
| GO:0005527                                                       | 6.63E-04 | 4.91E-04 | REACTOME_TOLL_LIKE_RECEPTOR_78_TLR78_CASCADE                     |
| REACTOME_TOLL_LIKE_RECEPTOR_78_TLR78_CASCADE                     | 8.42E-04 | 5.10E-04 | RPN1 PPI subnetwork                                              |
| ENSG00000163902                                                  | 1.62E-03 | 5.10E-04 | FK506 binding                                                    |
| GO:0005528                                                       | 6.63E-04 | 5.20E-04 | ARID5B PPI subnetwork                                            |
| ENSG00000150347                                                  | 7.60E-04 | 5.20E-04 | SEC31A PPI subnetwork                                            |
| ENSG00000138674                                                  | 1.23E-03 | 5.20E-04 | SEPT3 PPI subnetwork                                             |
| ENSG00000100167                                                  | 1.37E-03 | 5.20E-04 | ROGDI PPI subnetwork                                             |
| ENSG00000067836                                                  | 1.31E-03 | 5.30E-04 | NAPB PPI subnetwork                                              |
| MP:0004957                                                       | 5.34E-04 | 8.00E-04 | DCLK1 PPI subnetwork                                             |
| ENSG00000125814                                                  | 1.34E-03 | 5.50E-04 | ADARB2 PPI subnetwork                                            |
| ENSG00000185736                                                  | 8.02E-04 | 5.60E-04 | abnormal cardinal vein morphology                                |
| MP:0004783                                                       | 1.81E-03 | 5.60E-04 | RYR3 PPI subnetwork                                              |
| ENSG00000025772                                                  | 1.35E-03 | 5.80E-04 | columnar/cuboidal epithelial cell differentiation                |
| GO:0002065                                                       | 1.43E-03 | 5.90E-04 | RTN3 PPI subnetwork                                              |
| ENSG00000133318                                                  | 1.50E-03 | 6.00E-04 | LIN7B PPI subnetwork                                             |
| ENSG00000104863                                                  | 1.80E-03 | 6.00E-04 | AMOTL1 PPI subnetwork                                            |
| ENSG00000166025                                                  | 1.02E-03 | 6.10E-04 | REACTOME_UBIQUITIN:DEPENDENT_DEGRADATION_OF_CYCLIN_D1            |
| REACTOME_UBIQUITIN:DEPENDENT_DEGRADATION_OF_CYCLIN_D1            | 1.62E-03 | 6.10E-04 | USP11 PPI subnetwork                                             |

| ENSG00000102226                                                                                                                                                                                                              | 1.28E-03   | 6.20E-04  | ATP2B1 PPI subnetwork                                                             |
|------------------------------------------------------------------------------------------------------------------------------------------------------------------------------------------------------------------------------|------------|-----------|-----------------------------------------------------------------------------------|
| ENSG00000070961                                                                                                                                                                                                              | 9.08E-04   | 6.50E-04  | ENSG00000186979 PPI subnetwork                                                    |
| ENSG00000186979                                                                                                                                                                                                              | 9.97E-04   | 6.70E-04  | ZNF174 PPI subnetwork                                                             |
| ENSG00000103343                                                                                                                                                                                                              | 1.81E-03   | 6.90E-04  | REACTOME_ANTIGEN_PRESENTATION_FOLDING_ASSEMBLY_AND_PEPTIDE_LOADING_OF_CLASS_I_MHC |
| REACTOME_ANTIGEN_PRESENTATION_FOLDING_ASSEMBLY_AND_PEPTIDE_LOADING_OF_CLASS_I_MHC                                                                                                                                            | 1.25E-03   | 7.10E-04  | abnormal vascular development                                                     |
| MP:0000259                                                                                                                                                                                                                   | 1.29E-03   | 7.10E-04  | KIF21A PPI subnetwork                                                             |
| ENSG00000139116                                                                                                                                                                                                              | 1.80E-03   | 7.70E-04  | REACTOME_CDK:MEDIATED_PHOSPHORYLATION_AND_REMOVAL_OF_CD6                          |
| REACTOME_CDK:MEDIATED_PHOSPHORYLATION_AND_REMOVAL_OF_CD6                                                                                                                                                                     | 1.59E-03   | 7.90E-04  | testis tumor                                                                      |
| MP:0006262                                                                                                                                                                                                                   | 1.72E-03   | 7.90E-04  | abnormal blastocyst morphology                                                    |
| ENSG00000133083                                                                                                                                                                                                              | 2.15E-03   | 8.40E-04  | APPBP2 PPI subnetwork                                                             |
| ENSG00000062725                                                                                                                                                                                                              | 1.08E-03   | 8.60E-04  | PDE1B PPI subnetwork                                                              |
| ENSG00000123360                                                                                                                                                                                                              | 1.95E-03   | 8.60E-04  | abnormal body weight                                                              |
| MP:0001259                                                                                                                                                                                                                   | 1.22E-03   | 8.70E-04  | REACTOME_REGULATION_OF_MRNA_STABILITY_BY_PROTEINS_THAT_BIND_AU:RICH_ELEMENTS      |
| REACTOME_REGULATION_OF_MRNA_STABILITY_BY_PROTEINS_THAT_BIND_AU:RICH_ELEMENTS                                                                                                                                                 | 1.13E-03   | 8.90E-04  | REACTOME_APCCDC20_MEDIATED_DEGRADATION_OF_SECURIN                                 |
| REACTOME_APCCDC20_MEDIATED_DEGRADATION_OF_SECURIN                                                                                                                                                                            | 1.33E-03   | 8.90E-04  | STXBP5 PPI subnetwork                                                             |
| ENSG00000164506                                                                                                                                                                                                              | 1.05E-03   | 9.10E-04  | embryonic digestive tract morphogenesis                                           |
| GO:0048557                                                                                                                                                                                                                   | 1.86E-03   | 9.10E-04  | REACTOME_DESTABILIZATION_OF_MRNA_BY_AUF1_HNRNP_D0                                 |
| REACTOME_DESTABILIZATION_OF_MRNA_BY_AUF1_HNRNP_D0                                                                                                                                                                            | 1.94E-03   | 9.10E-04  | HLA-F PPI subnetwork                                                              |
| ENSG00000204642                                                                                                                                                                                                              | 2.31E-03   | 9.50E-04  | REACTOME_ACTIVATED_TLR4_SIGNALLING                                                |
| REACTOME_ACTIVATED_TLR4_SIGNALLING                                                                                                                                                                                           | 1.92E-03   | 9.60E-04  | REACTOME_UBIQUITIN:DEPENDENT_DEGRADATION_OF_CYCLIN_D                              |
| REACTOME_UBIQUITIN:DEPENDENT_DEGRADATION_OF_CYCLIN_D                                                                                                                                                                         | 1.62E-03   | 9.90E-04  | REACTOME_ACTIVATION_OF_CHAPERONES_BY_IRE1ALPHA                                    |
| REACTOME_ACTIVATION_OF_CHAPERONES_BY_IRE1ALPHA                                                                                                                                                                               | 2.20E-03   | 9.90E-04  | CAMK1 PPI subnetwork                                                              |
| ENSG00000134072                                                                                                                                                                                                              | 3.14E-03   | 9.90E-04  | COPE PPI subnetwork                                                               |
| (B) Leptin adjusted for BMI, European, additive model, sex-combined analysis. Coding variants included. MAX method used (Bonferroni correction for 1000 gene sets and 2 traits: P<2.5E-05 for both chi2Pvalue and empPvalue) |            |           |                                                                                   |
| Name                                                                                                                                                                                                                         | chi2Pvalue | empPvalue | Pathway/Gene-set                                                                  |
| GO:0032769                                                                                                                                                                                                                   | 6.37E-05   | 1.93E-05  | negative regulation of monooxygenase activity                                     |
| MP:0005501                                                                                                                                                                                                                   | 3.04E-05   | 4.62E-05  | abnormal skin physiology                                                          |
| ENSG00000206495                                                                                                                                                                                                              | 1.68E-04   | 4.71E-05  | TRIM39 PPI subnetwork                                                             |
| ENSG00000204599                                                                                                                                                                                                              | 1.68E-04   | 5.40E-05  | TRIM39 PPI subnetwork                                                             |
| ENSG00000206419                                                                                                                                                                                                              | 1.68E-04   | 6.00E-05  | ENSG00000206419 PPI subnetwork                                                    |
| ENSG00000198925                                                                                                                                                                                                              | 7.30E-05   | 9.60E-05  | ATG9A PPI subnetwork                                                              |
| ENSG00000105972                                                                                                                                                                                                              | 3.12E-04   | 1.70E-04  | ENSG00000105972 PPI subnetwork                                                    |
| MP:0003091                                                                                                                                                                                                                   | 3.86E-04   | 1.87E-04  | abnormal cell migration                                                           |
| ENSG00000142867                                                                                                                                                                                                              | 8.77E-04   | 3.36E-04  | BCL10 PPI subnetwork                                                              |

|                                                        |          |          |                                                        |
|--------------------------------------------------------|----------|----------|--------------------------------------------------------|
| GO:0033273                                             | 3.51E-04 | 5.01E-04 | response to vitamin                                    |
| ENSG00000163902                                        | 1.19E-03 | 4.91E-04 | RPN1 PPI subnetwork                                    |
| ENSG00000138674                                        | 1.06E-03 | 5.09E-04 | SEC31A PPI subnetwork                                  |
| GO:0002065                                             | 1.32E-03 | 6.10E-04 | columnar/cuboidal epithelial cell differentiation      |
| ENSG00000120254                                        | 9.48E-04 | 6.40E-04 | MTHFD1L PPI subnetwork                                 |
| REACTOME_TOLL_LIKE_RECEPTOR_78_TLR78_CASCADE           | 1.39E-03 | 6.40E-04 | REACTOME_TOLL_LIKE_RECEPTOR_78_TLR78_CASCADE           |
| REACTOME_MYD88_DEPENDENT_CASCADE_INITIATED_ON_ENDOSOME | 1.39E-03 | 6.40E-04 | REACTOME_MYD88_DEPENDENT_CASCADE_INITIATED_ON_ENDOSOME |
| ENSG00000165699                                        | 2.08E-03 | 7.60E-04 | TSC1 PPI subnetwork                                    |
| ENSG00000164506                                        | 1.09E-03 | 7.80E-04 | STXBP5 PPI subnetwork                                  |
| ENSG00000185825                                        | 1.38E-03 | 9.00E-04 | BCAP31 PPI subnetwork                                  |
| GO:0071299                                             | 2.22E-03 | 9.80E-04 | cellular response to vitamin A                         |
